# Supplementary material for: New insights on the early Mesozoic evolution of multiple tectonic regimes in the northeastern North China Craton from the detrital zircon provenance of sedimentary strata
Source: Copernicus journal article supplement (doi:10.5194/se-9-1375-2018), 2018-11-29
Supplement: Supplementary file 1 [file Supporting infromation.docx]

**Contents of this file**

Tables S1, S2

**Introduction**

**1.Tabe S1** is the zircon U-Pb dating data of early Mesozoic strata in northeastern North China Craton. Zircons were separated from samples using the conventional heavy liquid and magnetic techniques, and purified by handpicking under a binocular microscope at the Langfang Yantuo Geological Survey, Hebei Province, China. The handpicked zircons were examined under transmitted and reflected-light with an optical microscope, and in order to reveal their internal structures, cathodoluminescence (CL) images were obtained, using a JEOL scanning electron microscope housed at the State Key Laboratory of Continental Dynamics, Northwest University, China. In addition, the samples of 15JFS2-1 (allgovite) and 15JFS10-1(pyroxene andesite), provide on 52 and 32 zircons grains, respectively. Considering the few zircon grains, measurement for the two samples were conducted using a Cameca 1280 SIMS at the Institute of Geology and Geophysics, Chinese Academy of Sciences in Beijing.

**2.Table S2** is the zircon Hf isotopic data of the early Mesozoic strata in the northeastern North China Craton. *In situ* zircon Hf isotope analyses were conducted using a Neptune Plus MC-ICP-MS (Thermo Fisher Scientific, Germany) equipped with a 193 nm excimer ArF laser ablation system (Lambda Physik, Göttingen, Germany) that was hosted at the State Key Laboratory of Geological Processes and Mineral Resources, China University of Geosciences.

**Table Captions**

**Table S1**. Zircon U-Pb dating data of early Mesozoic strata in the northeastern North China Craton

**Table S2**. Zircon Hf isotopic data of early Mesozoic strata in the northeastern North China Craton
