# Supplementary material for: New insights on the early Mesozoic evolution of multiple tectonic regimes in the northeastern North China Craton from the detrital zircon provenance of sedimentary strata
Source: Copernicus journal article supplement (doi:10.5194/se-9-1375-2018), 2018-11-29
Supplement: Supplementary file 2 [file Tabel S1.doc]

**Table S1** **Zircon U-Pb dating data of early Mesozoic strata in** **the northeastern North China Craton**

| spot | Th(ppm) | U(ppm) | Th/U | Isotopic ratios | | | | | | | |  | Ages (Ma) | | | | | | | |
| --- | --- | --- | --- | --- | --- | --- | --- | --- | --- | --- | --- | --- | --- | --- | --- | --- | --- | --- | --- | --- |
| 207Pb/206Pb | |  | 207Pb/235U777 | |  | 206Pb/238U | |  | 207Pb/206Pb | |  | 207Pb/235U | |  | 206Pb/238U | |
| ratio | 1 |  | ratio | 1 |  | ratio | 1 |  | age | 1 |  | age | 1 |  | age | 1 |
| 16LJ6-1 medium-grained feldspathic quartz sandstone from the Heisonggou Formation | | | | | | | | | | | | | | | | | | | | |
| 16LJ6-1-01 | 1347 | 1689 | 0.80 | 0.05327 | 0.00142 |  | 0.37822 | 0.00948 |  | 0.05167 | 0.00056 |  | 340 | 37 |  | 326 | 7 |  | 325 | 3 |
| 16LJ6-1-02 | 255 | 493 | 0.52 | 0.05313 | 0.00247 |  | 0.28986 | 0.01346 |  | 0.03965 | 0.00052 |  | 334 | 81 |  | 258 | 11 |  | 251 | 3 |
| 16LJ6-1-03 | 342 | 877 | 0.39 | 0.05143 | 0.00187 |  | 0.36045 | 0.01272 |  | 0.05084 | 0.00048 |  | 260 | 64 |  | 313 | 9 |  | 320 | 3 |
| 16LJ6-1-04 | 272 | 600 | 0.45 | 0.16280 | 0.00264 |  | 10.53282 | 0.16169 |  | 0.46605 | 0.00320 |  | 2485 | 17 |  | 2483 | 14 |  | 2466 | 14 |
| 16LJ6-1-05 | 533 | 746 | 0.71 | 0.05194 | 0.00244 |  | 0.28887 | 0.01301 |  | 0.04064 | 0.00048 |  | 283 | 82 |  | 258 | 10 |  | 257 | 3 |
| 16LJ6-1-06 | 1537 | 3494 | 0.44 | 0.05495 | 0.00155 |  | 0.29958 | 0.00776 |  | 0.03935 | 0.00033 |  | 410 | 43 |  | 266 | 6 |  | 249 | 2 |
| 16LJ6-1-07 | 479 | 1044 | 0.46 | 0.15860 | 0.00292 |  | 10.27392 | 0.19817 |  | 0.46470 | 0.00440 |  | 2441 | 20 |  | 2460 | 18 |  | 2460 | 19 |
| 16LJ6-1-09 | 721 | 829 | 0.87 | 0.05125 | 0.00237 |  | 0.27888 | 0.01242 |  | 0.03973 | 0.00054 |  | 252 | 77 |  | 250 | 10 |  | 251 | 3 |
| 16LJ6-1-10 | 337 | 1163 | 0.29 | 0.15270 | 0.00256 |  | 7.66548 | 0.14514 |  | 0.36185 | 0.00298 |  | 2376 | 21 |  | 2193 | 17 |  | 1991 | 14 |
| 16LJ6-1-11 | 1292 | 2946 | 0.44 | 0.05092 | 0.00153 |  | 0.27678 | 0.00814 |  | 0.03956 | 0.00036 |  | 237 | 51 |  | 248 | 6 |  | 250 | 2 |
| 16LJ6-1-12 | 3159 | 2426 | 1.30 | 0.05314 | 0.00248 |  | 0.34393 | 0.01518 |  | 0.04725 | 0.00051 |  | 335 | 81 |  | 300 | 11 |  | 298 | 3 |
| 16LJ6-1-13 | 968 | 2508 | 0.39 | 0.05278 | 0.00142 |  | 0.37663 | 0.01097 |  | 0.05173 | 0.00049 |  | 319 | 49 |  | 325 | 8 |  | 325 | 3 |
| 16LJ6-1-14 | 1112 | 2236 | 0.50 | 0.15155 | 0.00268 |  | 9.69817 | 0.19545 |  | 0.46297 | 0.00357 |  | 2363 | 24 |  | 2407 | 19 |  | 2453 | 16 |
| 16LJ6-1-15 | 300 | 995 | 0.30 | 0.15044 | 0.00251 |  | 9.15436 | 0.16761 |  | 0.43999 | 0.00299 |  | 2351 | 22 |  | 2354 | 17 |  | 2351 | 13 |
| 16LJ6-1-16 | 1247 | 1423 | 0.88 | 0.10749 | 0.00179 |  | 5.00985 | 0.09895 |  | 0.33671 | 0.00350 |  | 1757 | 21 |  | 1821 | 17 |  | 1871 | 17 |
| 16LJ6-1-17 | 1150 | 1481 | 0.78 | 0.05293 | 0.00150 |  | 0.37795 | 0.01043 |  | 0.05189 | 0.00050 |  | 326 | 45 |  | 326 | 8 |  | 326 | 3 |
| 16LJ6-1-18 | 647 | 934 | 0.69 | 0.04983 | 0.00195 |  | 0.27131 | 0.01037 |  | 0.03961 | 0.00042 |  | 187 | 69 |  | 244 | 8 |  | 250 | 3 |
| 16LJ6-1-19 | 463 | 1095 | 0.42 | 0.05216 | 0.00175 |  | 0.34284 | 0.01185 |  | 0.04742 | 0.00053 |  | 293 | 58 |  | 299 | 9 |  | 299 | 3 |
| 16LJ6-1-20 | 579 | 956 | 0.61 | 0.15608 | 0.00260 |  | 10.06702 | 0.18256 |  | 0.46481 | 0.00442 |  | 2414 | 18 |  | 2441 | 17 |  | 2461 | 19 |
| 16LJ6-1-21 | 505 | 563 | 0.90 | 0.07110 | 0.00216 |  | 0.94805 | 0.02889 |  | 0.09652 | 0.00105 |  | 960 | 44 |  | 677 | 15 |  | 594 | 6 |
| 16LJ6-1-22 | 656 | 2626 | 0.25 | 0.05094 | 0.00120 |  | 0.32790 | 0.00775 |  | 0.04631 | 0.00037 |  | 238 | 40 |  | 288 | 6 |  | 292 | 2 |
| 16LJ6-1-23 | 925 | 995 | 0.93 | 0.05157 | 0.00181 |  | 0.32631 | 0.01107 |  | 0.04577 | 0.00042 |  | 266 | 61 |  | 287 | 8 |  | 289 | 3 |
| 16LJ6-1-24 | 1141 | 1288 | 0.89 | 0.05062 | 0.00169 |  | 0.32637 | 0.01176 |  | 0.04625 | 0.00059 |  | 224 | 60 |  | 287 | 9 |  | 291 | 4 |
| 16LJ6-1-25 | 664 | 939 | 0.71 | 0.05237 | 0.00286 |  | 0.28582 | 0.01516 |  | 0.03958 | 0.00053 |  | 302 | 97 |  | 255 | 12 |  | 250 | 3 |
| 16LJ6-1-26 | 1338 | 1601 | 0.84 | 0.05221 | 0.00164 |  | 0.36941 | 0.01085 |  | 0.05124 | 0.00045 |  | 295 | 51 |  | 319 | 8 |  | 322 | 3 |
| 16LJ6-1-27 | 227 | 475 | 0.48 | 0.04879 | 0.00341 |  | 0.27249 | 0.01879 |  | 0.04061 | 0.00063 |  | 138 | 126 |  | 245 | 15 |  | 257 | 4 |
| 16LJ6-1-28 | 126 | 1721 | 0.07 | 0.05407 | 0.00245 |  | 0.34228 | 0.01328 |  | 0.04672 | 0.00053 |  | 374 | 67 |  | 299 | 10 |  | 294 | 3 |
| 16LJ6-1-29 | 735 | 942 | 0.78 | 0.05265 | 0.00249 |  | 0.37258 | 0.01746 |  | 0.05136 | 0.00058 |  | 314 | 86 |  | 322 | 13 |  | 323 | 4 |
| 16LJ6-1-30 | 199 | 276 | 0.72 | 0.12835 | 0.00427 |  | 7.28794 | 0.27944 |  | 0.40883 | 0.00697 |  | 2075 | 44 |  | 2147 | 34 |  | 2210 | 32 |
| 16LJ6-1-31 | 998 | 1973 | 0.51 | 0.14592 | 0.00447 |  | 8.32154 | 0.27623 |  | 0.41309 | 0.00452 |  | 2299 | 42 |  | 2267 | 30 |  | 2229 | 21 |
| 16LJ6-1-32 | 444 | 839 | 0.53 | 0.05243 | 0.00241 |  | 0.33340 | 0.01482 |  | 0.04674 | 0.00051 |  | 304 | 82 |  | 292 | 11 |  | 294 | 3 |
| 16LJ6-1-34 | 2497 | 338 | 7.40 | 0.14462 | 0.00345 |  | 8.71567 | 0.22171 |  | 0.44046 | 0.00387 |  | 2283 | 32 |  | 2309 | 23 |  | 2353 | 17 |
| 16LJ6-1-36 | 306 | 440 | 0.70 | 0.15738 | 0.00413 |  | 9.10611 | 0.26125 |  | 0.42484 | 0.00383 |  | 2428 | 36 |  | 2349 | 26 |  | 2282 | 17 |
| 16LJ6-1-38 | 50 | 185 | 0.27 | 0.13557 | 0.00332 |  | 7.64808 | 0.21283 |  | 0.41240 | 0.00507 |  | 2171 | 31 |  | 2191 | 25 |  | 2226 | 23 |
| 16LJ6-1-39 | 1198 | 2104 | 0.57 | 0.05446 | 0.00192 |  | 0.38202 | 0.01329 |  | 0.05131 | 0.00056 |  | 390 | 58 |  | 329 | 10 |  | 323 | 3 |
| 16LJ6-1-40 | 999 | 2347 | 0.43 | 0.04890 | 0.00139 |  | 0.26678 | 0.00758 |  | 0.03985 | 0.00035 |  | 143 | 50 |  | 240 | 6 |  | 252 | 2 |
| 16LJ6-1-41 | 1632 | 3174 | 0.51 | 0.05174 | 0.00128 |  | 0.28484 | 0.00725 |  | 0.04001 | 0.00035 |  | 274 | 42 |  | 254 | 6 |  | 253 | 2 |
| 16LJ6-1-42 | 973 | 2009 | 0.48 | 0.05379 | 0.00167 |  | 0.29831 | 0.00879 |  | 0.04048 | 0.00034 |  | 362 | 51 |  | 265 | 7 |  | 256 | 2 |
| 16LJ6-1-46 | 409 | 464 | 0.88 | 0.05457 | 0.00265 |  | 0.39113 | 0.01954 |  | 0.05178 | 0.00070 |  | 395 | 88 |  | 335 | 14 |  | 325 | 4 |
| 16LJ6-1-47 | 1941 | 2400 | 0.81 | 0.05472 | 0.00147 |  | 0.35314 | 0.00904 |  | 0.04695 | 0.00041 |  | 401 | 41 |  | 307 | 7 |  | 296 | 3 |
| 16LJ6-1-48 | 274 | 1460 | 0.19 | 0.05522 | 0.00187 |  | 0.38775 | 0.01302 |  | 0.05110 | 0.00051 |  | 421 | 57 |  | 333 | 10 |  | 321 | 3 |
| 16LJ6-1-49 | 1466 | 1921 | 0.76 | 0.05222 | 0.00153 |  | 0.37091 | 0.01091 |  | 0.05139 | 0.00048 |  | 295 | 50 |  | 320 | 8 |  | 323 | 3 |
| 16LJ6-1-51 | 1474 | 1590 | 0.93 | 0.05234 | 0.00157 |  | 0.37142 | 0.01109 |  | 0.05146 | 0.00052 |  | 300 | 49 |  | 321 | 8 |  | 323 | 3 |
| 16LJ6-1-52 | 1966 | 1773 | 1.11 | 0.05399 | 0.00137 |  | 0.38110 | 0.00927 |  | 0.05116 | 0.00047 |  | 371 | 38 |  | 328 | 7 |  | 322 | 3 |
| 16LJ6-1-54 | 373 | 537 | 0.69 | 0.05194 | 0.00246 |  | 0.28782 | 0.01373 |  | 0.04020 | 0.00054 |  | 283 | 85 |  | 257 | 11 |  | 254 | 3 |
| 16LJ6-1-55 | 1264 | 1387 | 0.91 | 0.10950 | 0.00203 |  | 4.95257 | 0.09316 |  | 0.32623 | 0.00324 |  | 1791 | 20 |  | 1811 | 16 |  | 1820 | 16 |
| 16LJ6-1-56 | 1337 | 1502 | 0.89 | 0.05193 | 0.00165 |  | 0.33307 | 0.01014 |  | 0.04648 | 0.00045 |  | 282 | 52 |  | 292 | 8 |  | 293 | 3 |
| 16LJ6-1-57 | 1358 | 3392 | 0.40 | 0.04961 | 0.00124 |  | 0.27477 | 0.00704 |  | 0.03992 | 0.00036 |  | 177 | 43 |  | 246 | 6 |  | 252 | 2 |
| 16LJ6-1-58 | 126 | 527 | 0.24 | 0.15967 | 0.00256 |  | 10.25314 | 0.16803 |  | 0.46264 | 0.00343 |  | 2452 | 18 |  | 2458 | 15 |  | 2451 | 15 |
| 16LJ6-1-59 | 468 | 736 | 0.64 | 0.05291 | 0.00275 |  | 0.28815 | 0.01441 |  | 0.03967 | 0.00054 |  | 325 | 89 |  | 257 | 11 |  | 251 | 3 |
| 16LJ6-1-61 | 672 | 1987 | 0.34 | 0.15995 | 0.00303 |  | 9.94652 | 0.18913 |  | 0.44440 | 0.00377 |  | 2455 | 21 |  | 2430 | 18 |  | 2370 | 17 |
| 16LJ6-1-62 | 1109 | 844 | 1.31 | 0.05351 | 0.00215 |  | 0.29772 | 0.01132 |  | 0.04033 | 0.00049 |  | 351 | 64 |  | 265 | 9 |  | 255 | 3 |
| 16LJ6-1-64 | 1299 | 3186 | 0.41 | 0.05275 | 0.00157 |  | 0.28858 | 0.00856 |  | 0.03920 | 0.00031 |  | 318 | 53 |  | 257 | 7 |  | 248 | 2 |
| 16LJ6-1-65 | 1313 | 2048 | 0.64 | 0.05075 | 0.00131 |  | 0.36027 | 0.00934 |  | 0.05110 | 0.00054 |  | 229 | 40 |  | 312 | 7 |  | 321 | 3 |
| 16LJ6-1-66 | 42 | 327 | 0.13 | 0.14621 | 0.00302 |  | 8.69968 | 0.19488 |  | 0.42573 | 0.00456 |  | 2302 | 24 |  | 2307 | 20 |  | 2286 | 21 |
| 16LJ6-1-67 | 687 | 962 | 0.71 | 0.05066 | 0.00169 |  | 0.35843 | 0.01168 |  | 0.05095 | 0.00048 |  | 225 | 58 |  | 311 | 9 |  | 320 | 3 |
| 16LJ6-1-68 | 392 | 666 | 0.59 | 0.05154 | 0.00207 |  | 0.38352 | 0.01508 |  | 0.05403 | 0.00061 |  | 265 | 69 |  | 330 | 11 |  | 339 | 4 |
| 16LJ6-1-69 | 261 | 404 | 0.64 | 0.05412 | 0.00298 |  | 0.29334 | 0.01518 |  | 0.03972 | 0.00049 |  | 376 | 94 |  | 261 | 12 |  | 251 | 3 |
| 16LJ6-1-70 | 577 | 1028 | 0.56 | 0.05084 | 0.00183 |  | 0.27686 | 0.00961 |  | 0.03957 | 0.00042 |  | 234 | 60 |  | 248 | 8 |  | 250 | 3 |
| 16LJ6-1-71 | 287 | 367 | 0.78 | 0.04982 | 0.00280 |  | 0.27285 | 0.01480 |  | 0.04004 | 0.00056 |  | 187 | 99 |  | 245 | 12 |  | 253 | 3 |
| 16LJ6-1-72 | 1187 | 1340 | 0.89 | 0.05266 | 0.00147 |  | 0.39164 | 0.01065 |  | 0.05392 | 0.00058 |  | 314 | 42 |  | 336 | 8 |  | 339 | 4 |
| 16LJ6-1-73 | 1235 | 3354 | 0.37 | 0.15613 | 0.00268 |  | 9.06366 | 0.15639 |  | 0.41851 | 0.00318 |  | 2414 | 19 |  | 2344 | 16 |  | 2254 | 14 |
| 16LJ6-1-74 | 1534 | 2473 | 0.62 | 0.05113 | 0.00126 |  | 0.28177 | 0.00694 |  | 0.03989 | 0.00040 |  | 247 | 38 |  | 252 | 5 |  | 252 | 2 |
| 16LJ6-1-76 | 183 | 1751 | 0.10 | 0.05219 | 0.00156 |  | 0.33371 | 0.01029 |  | 0.04616 | 0.00038 |  | 294 | 55 |  | 292 | 8 |  | 291 | 2 |
| 16LJ6-1-77 | 847 | 722 | 1.17 | 0.05709 | 0.00232 |  | 0.40380 | 0.01652 |  | 0.05109 | 0.00055 |  | 495 | 71 |  | 344 | 12 |  | 321 | 3 |
| 16LJ6-1-78 | 445 | 808 | 0.55 | 0.05450 | 0.00219 |  | 0.30166 | 0.01152 |  | 0.04084 | 0.00063 |  | 392 | 58 |  | 268 | 9 |  | 258 | 4 |
| 16LJ6-1-79 | 91 | 239 | 0.38 | 0.14519 | 0.00326 |  | 7.95900 | 0.19554 |  | 0.39611 | 0.00504 |  | 2290 | 25 |  | 2226 | 22 |  | 2151 | 23 |
| 16LJ6-1-80 | 417 | 1021 | 0.41 | 0.12343 | 0.00199 |  | 6.39247 | 0.11522 |  | 0.37386 | 0.00354 |  | 2006 | 19 |  | 2031 | 16 |  | 2048 | 17 |
| 15LJ4-11 fine-grained feldspathic quartz sandstone from the Heisonggou Formation | | | | | | | | | | | | | | | | | | | | |
| 15LJ4-11-01 | 298 | 867 | 0.34 | 0.05074 | 0.00121 |  | 0.30024 | 0.00732 |  | 0.04266 | 0.00045 |  | 229 | 37 |  | 267 | 6 |  | 269 | 3 |
| 15LJ4-11-02 | 414 | 584 | 0.71 | 0.05210 | 0.00170 |  | 0.37097 | 0.01161 |  | 0.05152 | 0.00060 |  | 290 | 50 |  | 320 | 9 |  | 324 | 4 |
| 15LJ4-11-03 | 44 | 892 | 0.05 | 0.11240 | 0.00157 |  | 5.46689 | 0.08486 |  | 0.34981 | 0.00348 |  | 1839 | 15 |  | 1895 | 13 |  | 1934 | 17 |
| 15LJ4-11-04 | 45 | 149 | 0.30 | 0.11139 | 0.00207 |  | 5.13549 | 0.09583 |  | 0.33281 | 0.00367 |  | 1822 | 19 |  | 1842 | 16 |  | 1852 | 18 |
| 15LJ4-11-05 | 186 | 163 | 1.14 | 0.16416 | 0.00273 |  | 10.87293 | 0.19681 |  | 0.47609 | 0.00507 |  | 2499 | 17 |  | 2512 | 17 |  | 2510 | 22 |
| 15LJ4-11-06 | 87 | 187 | 0.47 | 0.16849 | 0.00292 |  | 11.40250 | 0.21668 |  | 0.48711 | 0.00609 |  | 2543 | 16 |  | 2557 | 18 |  | 2558 | 26 |
| 15LJ4-11-07 | 84 | 98 | 0.85 | 0.16295 | 0.00361 |  | 10.31614 | 0.22395 |  | 0.45723 | 0.00569 |  | 2487 | 20 |  | 2464 | 20 |  | 2427 | 25 |
| 15LJ4-11-08 | 49 | 579 | 0.09 | 0.16647 | 0.00298 |  | 10.78480 | 0.19392 |  | 0.46513 | 0.00416 |  | 2522 | 18 |  | 2505 | 17 |  | 2462 | 18 |
| 15LJ4-11-09 | 111 | 102 | 1.09 | 0.20069 | 0.00366 |  | 15.41221 | 0.36947 |  | 0.54847 | 0.00814 |  | 2832 | 21 |  | 2841 | 23 |  | 2819 | 34 |
| 15LJ4-11-10 | 105 | 193 | 0.54 | 0.11371 | 0.00203 |  | 5.25695 | 0.09787 |  | 0.33242 | 0.00322 |  | 1859 | 20 |  | 1862 | 16 |  | 1850 | 16 |
| 15LJ4-11-11 | 199 | 139 | 1.43 | 0.16725 | 0.00280 |  | 10.98182 | 0.17780 |  | 0.47373 | 0.00450 |  | 2530 | 15 |  | 2522 | 15 |  | 2500 | 20 |
| 15LJ4-11-12 | 187 | 303 | 0.62 | 0.05310 | 0.00247 |  | 0.30889 | 0.01328 |  | 0.04258 | 0.00063 |  | 333 | 71 |  | 273 | 10 |  | 269 | 4 |
| 15LJ4-11-13 | 645 | 433 | 1.49 | 0.05392 | 0.00177 |  | 0.42617 | 0.01374 |  | 0.05714 | 0.00063 |  | 368 | 53 |  | 360 | 10 |  | 358 | 4 |
| 15LJ4-11-14 | 295 | 184 | 1.61 | 0.16727 | 0.00297 |  | 10.99409 | 0.19346 |  | 0.47365 | 0.00428 |  | 2530 | 18 |  | 2523 | 16 |  | 2500 | 19 |
| 15LJ4-11-15 | 1 | 78 | 0.01 | 0.05540 | 0.00332 |  | 0.46531 | 0.02646 |  | 0.06124 | 0.00104 |  | 428 | 97 |  | 388 | 18 |  | 383 | 6 |
| 15LJ4-11-16 | 57 | 29 | 1.93 | 0.16738 | 0.00528 |  | 9.91176 | 0.38469 |  | 0.42668 | 0.01058 |  | 2532 | 34 |  | 2427 | 36 |  | 2291 | 48 |
| 15LJ4-11-17 | 109 | 207 | 0.53 | 0.05331 | 0.00231 |  | 0.35287 | 0.01403 |  | 0.04838 | 0.00062 |  | 342 | 67 |  | 307 | 11 |  | 305 | 4 |
| 15LJ4-11-18 | 263 | 320 | 0.82 | 0.05665 | 0.00182 |  | 0.38013 | 0.01175 |  | 0.04863 | 0.00044 |  | 478 | 52 |  | 327 | 9 |  | 306 | 3 |
| 15LJ4-11-19 | 59 | 287 | 0.21 | 0.11458 | 0.00176 |  | 5.28133 | 0.08773 |  | 0.33210 | 0.00330 |  | 1873 | 16 |  | 1866 | 14 |  | 1849 | 16 |
| 15LJ4-11-20 | 84 | 863 | 0.10 | 0.11534 | 0.00185 |  | 6.22627 | 0.15887 |  | 0.38894 | 0.00836 |  | 1885 | 21 |  | 2008 | 22 |  | 2118 | 39 |
| 15LJ4-11-21 | 336 | 952 | 0.35 | 0.05167 | 0.00115 |  | 0.34287 | 0.00762 |  | 0.04787 | 0.00048 |  | 271 | 33 |  | 299 | 6 |  | 301 | 3 |
| 15LJ4-11-22 | 277 | 326 | 0.85 | 0.16452 | 0.00278 |  | 10.75465 | 0.19730 |  | 0.47016 | 0.00503 |  | 2503 | 17 |  | 2502 | 17 |  | 2484 | 22 |
| 15LJ4-11-23 | 20 | 25 | 0.81 | 0.05956 | 0.00585 |  | 0.45232 | 0.04082 |  | 0.05704 | 0.00164 |  | 588 | 147 |  | 379 | 29 |  | 358 | 10 |
| 15LJ4-11-25 | 72 | 142 | 0.51 | 0.15761 | 0.00257 |  | 10.10786 | 0.21299 |  | 0.46312 | 0.00733 |  | 2430 | 17 |  | 2445 | 19 |  | 2453 | 32 |
| 15LJ4-11-26 | 190 | 315 | 0.60 | 0.05746 | 0.00222 |  | 0.31584 | 0.01189 |  | 0.03994 | 0.00050 |  | 509 | 60 |  | 279 | 9 |  | 252 | 3 |
| 15LJ4-11-27 | 373 | 423 | 0.88 | 0.05337 | 0.00174 |  | 0.35570 | 0.01143 |  | 0.04833 | 0.00050 |  | 344 | 54 |  | 309 | 9 |  | 304 | 3 |
| 15LJ4-11-28 | 177 | 271 | 0.65 | 0.05185 | 0.00214 |  | 0.30403 | 0.01259 |  | 0.04245 | 0.00052 |  | 279 | 72 |  | 270 | 10 |  | 268 | 3 |
| 15LJ4-11-29 | 78 | 105 | 0.74 | 0.05464 | 0.00383 |  | 0.38311 | 0.02536 |  | 0.05140 | 0.00098 |  | 397 | 114 |  | 329 | 19 |  | 323 | 6 |
| 15LJ4-11-30 | 60 | 220 | 0.27 | 0.14415 | 0.00324 |  | 7.61338 | 0.15030 |  | 0.38307 | 0.00409 |  | 2278 | 40 |  | 2186 | 18 |  | 2091 | 19 |
| 15LJ4-11-31 | 250 | 253 | 0.99 | 0.16512 | 0.00375 |  | 9.89586 | 0.20645 |  | 0.43467 | 0.00388 |  | 2509 | 39 |  | 2425 | 19 |  | 2327 | 17 |
| 15LJ4-11-32 | 200 | 370 | 0.54 | 0.05658 | 0.00192 |  | 0.37493 | 0.01238 |  | 0.04830 | 0.00057 |  | 475 | 52 |  | 323 | 9 |  | 304 | 3 |
| 15LJ4-11-33 | 206 | 241 | 0.85 | 0.05409 | 0.00196 |  | 0.29230 | 0.01027 |  | 0.03962 | 0.00051 |  | 375 | 56 |  | 260 | 8 |  | 250 | 3 |
| 15LJ4-11-34 | 174 | 289 | 0.60 | 0.11091 | 0.00173 |  | 4.88350 | 0.07975 |  | 0.31844 | 0.00262 |  | 1814 | 18 |  | 1799 | 14 |  | 1782 | 13 |
| 15LJ4-11-36 | 117 | 119 | 0.98 | 0.05243 | 0.00401 |  | 0.27685 | 0.01854 |  | 0.03926 | 0.00092 |  | 304 | 110 |  | 248 | 15 |  | 248 | 6 |
| 15LJ4-11-37 | 112 | 117 | 0.96 | 0.16466 | 0.00260 |  | 10.71419 | 0.18295 |  | 0.47036 | 0.00445 |  | 2504 | 16 |  | 2499 | 16 |  | 2485 | 20 |
| 15LJ4-11-38 | 224 | 208 | 1.08 | 0.05559 | 0.00168 |  | 0.52150 | 0.01616 |  | 0.06826 | 0.00083 |  | 436 | 47 |  | 426 | 11 |  | 426 | 5 |
| 15LJ4-11-39 | 157 | 169 | 0.93 | 0.05167 | 0.00238 |  | 0.42895 | 0.01783 |  | 0.06084 | 0.00103 |  | 271 | 64 |  | 362 | 13 |  | 381 | 6 |
| 15LJ4-11-40 | 180 | 627 | 0.29 | 0.05410 | 0.00137 |  | 0.43224 | 0.01086 |  | 0.05780 | 0.00048 |  | 375 | 41 |  | 365 | 8 |  | 362 | 3 |
| 15LJ4-11-41 | 146 | 498 | 0.29 | 0.15819 | 0.00244 |  | 8.78083 | 0.14016 |  | 0.40070 | 0.00352 |  | 2436 | 15 |  | 2316 | 15 |  | 2172 | 16 |
| 15LJ4-11-42 | 71 | 107 | 0.67 | 0.05538 | 0.00346 |  | 0.31888 | 0.01823 |  | 0.04287 | 0.00082 |  | 428 | 93 |  | 281 | 14 |  | 271 | 5 |
| 15LJ4-11-43 | 278 | 355 | 0.78 | 0.05568 | 0.00175 |  | 0.39399 | 0.01234 |  | 0.05125 | 0.00056 |  | 440 | 50 |  | 337 | 9 |  | 322 | 3 |
| 15LJ4-11-44 | 72 | 197 | 0.37 | 0.11417 | 0.00186 |  | 5.67459 | 0.10684 |  | 0.35877 | 0.00407 |  | 1867 | 18 |  | 1928 | 16 |  | 1976 | 19 |
| 15LJ4-11-45 | 268 | 246 | 1.09 | 0.05371 | 0.00211 |  | 0.44759 | 0.01562 |  | 0.06112 | 0.00090 |  | 359 | 52 |  | 376 | 11 |  | 382 | 5 |
| 15LJ4-11-46 | 705 | 1476 | 0.48 | 0.05295 | 0.00090 |  | 0.37543 | 0.00654 |  | 0.05122 | 0.00042 |  | 327 | 25 |  | 324 | 5 |  | 322 | 3 |
| 15LJ4-11-49 | 16 | 283 | 0.06 | 0.05171 | 0.00213 |  | 0.30664 | 0.01268 |  | 0.04318 | 0.00072 |  | 273 | 64 |  | 272 | 10 |  | 272 | 4 |
| 15LJ4-11-50 | 120 | 141 | 0.85 | 0.16555 | 0.00278 |  | 10.76696 | 0.21440 |  | 0.46969 | 0.00614 |  | 2513 | 17 |  | 2503 | 19 |  | 2482 | 27 |
| 15LJ4-11-52 | 78 | 143 | 0.54 | 0.16744 | 0.00235 |  | 9.94558 | 0.14952 |  | 0.42884 | 0.00387 |  | 2532 | 14 |  | 2430 | 14 |  | 2301 | 17 |
| 15LJ4-11-53 | 156 | 128 | 1.22 | 0.13406 | 0.00216 |  | 7.08113 | 0.12203 |  | 0.38101 | 0.00363 |  | 2152 | 17 |  | 2122 | 15 |  | 2081 | 17 |
| 15LJ4-11-54 | 90 | 214 | 0.42 | 0.17016 | 0.00278 |  | 10.82151 | 0.17620 |  | 0.45882 | 0.00410 |  | 2559 | 16 |  | 2508 | 15 |  | 2434 | 18 |
| 15LJ4-11-55 | 132 | 405 | 0.33 | 0.11074 | 0.00165 |  | 5.09990 | 0.07786 |  | 0.33186 | 0.00287 |  | 1812 | 16 |  | 1836 | 13 |  | 1847 | 14 |
| 15LJ4-11-56 | 449 | 393 | 1.14 | 0.05726 | 0.00178 |  | 0.40924 | 0.01238 |  | 0.05173 | 0.00058 |  | 502 | 47 |  | 348 | 9 |  | 325 | 4 |
| 15LJ4-11-57 | 123 | 864 | 0.14 | 0.11237 | 0.00165 |  | 5.22007 | 0.08203 |  | 0.33465 | 0.00320 |  | 1838 | 15 |  | 1856 | 13 |  | 1861 | 15 |
| 15LJ4-11-58 | 525 | 544 | 0.96 | 0.15417 | 0.00252 |  | 9.15551 | 0.18080 |  | 0.42534 | 0.00423 |  | 2393 | 20 |  | 2354 | 18 |  | 2285 | 19 |
| 15LJ4-11-59 | 82 | 134 | 0.61 | 0.14559 | 0.00284 |  | 8.65901 | 0.19922 |  | 0.42952 | 0.00679 |  | 2295 | 20 |  | 2303 | 21 |  | 2304 | 31 |
| 15LJ4-11-60 | 171 | 266 | 0.64 | 0.05415 | 0.00272 |  | 0.29895 | 0.01417 |  | 0.04027 | 0.00066 |  | 377 | 77 |  | 266 | 11 |  | 255 | 4 |
| 15LJ4-11-61 | 453 | 333 | 1.36 | 0.16409 | 0.00242 |  | 10.66856 | 0.17599 |  | 0.46784 | 0.00475 |  | 2498 | 15 |  | 2495 | 15 |  | 2474 | 21 |
| 15LJ4-11-62 | 295 | 464 | 0.64 | 0.05431 | 0.00296 |  | 0.30199 | 0.01597 |  | 0.04033 | 0.00054 |  | 384 | 126 |  | 268 | 12 |  | 255 | 3 |
| 15LJ4-11-63 | 191 | 319 | 0.60 | 0.16467 | 0.00244 |  | 10.65245 | 0.15785 |  | 0.46551 | 0.00375 |  | 2504 | 14 |  | 2493 | 14 |  | 2464 | 16 |
| 15LJ4-11-64 | 171 | 351 | 0.49 | 0.11347 | 0.00187 |  | 5.19835 | 0.08734 |  | 0.32962 | 0.00315 |  | 1856 | 17 |  | 1852 | 14 |  | 1837 | 15 |
| 15LJ4-11-65 | 107 | 212 | 0.50 | 0.05400 | 0.00272 |  | 0.29845 | 0.01506 |  | 0.03992 | 0.00059 |  | 371 | 87 |  | 265 | 12 |  | 252 | 4 |
| 15LJ4-11-66 | 41 | 139 | 0.29 | 0.14924 | 0.00321 |  | 8.56387 | 0.18975 |  | 0.41225 | 0.00447 |  | 2337 | 23 |  | 2293 | 20 |  | 2225 | 20 |
| 15LJ4-11-68 | 114 | 64 | 1.78 | 0.16510 | 0.00358 |  | 10.61757 | 0.22417 |  | 0.46595 | 0.00648 |  | 2509 | 18 |  | 2490 | 20 |  | 2466 | 28 |
| 15LJ4-11-69 | 23 | 188 | 0.12 | 0.05263 | 0.00312 |  | 0.31626 | 0.01930 |  | 0.04343 | 0.00091 |  | 313 | 101 |  | 279 | 15 |  | 274 | 6 |
| 15LJ4-11-71 | 239 | 941 | 0.25 | 0.11383 | 0.00181 |  | 5.47722 | 0.09134 |  | 0.34610 | 0.00301 |  | 1862 | 18 |  | 1897 | 14 |  | 1916 | 14 |
| 15LJ4-11-72 | 356 | 83 | 4.31 | 0.16418 | 0.00307 |  | 10.68913 | 0.20792 |  | 0.46866 | 0.00448 |  | 2499 | 20 |  | 2496 | 18 |  | 2478 | 20 |
| 15LJ4-11-73 | 358 | 602 | 0.60 | 0.05237 | 0.00155 |  | 0.31189 | 0.00910 |  | 0.04301 | 0.00046 |  | 301 | 47 |  | 276 | 7 |  | 271 | 3 |
| 15LJ4-11-74 | 158 | 531 | 0.30 | 0.11318 | 0.00159 |  | 5.31948 | 0.08033 |  | 0.33840 | 0.00305 |  | 1851 | 15 |  | 1872 | 13 |  | 1879 | 15 |
| 15LJ4-11-75 | 143 | 231 | 0.62 | 0.11225 | 0.00174 |  | 5.06854 | 0.07812 |  | 0.32560 | 0.00278 |  | 1836 | 16 |  | 1831 | 13 |  | 1817 | 14 |
| 15LJ4-11-77 | 453 | 232 | 1.95 | 0.05039 | 0.00196 |  | 0.27670 | 0.01061 |  | 0.03998 | 0.00051 |  | 213 | 65 |  | 248 | 8 |  | 253 | 3 |
| 15LJ4-11-78 | 278 | 410 | 0.68 | 0.05010 | 0.00150 |  | 0.35887 | 0.01121 |  | 0.05159 | 0.00062 |  | 200 | 50 |  | 311 | 8 |  | 324 | 4 |
| 15LJ4-11-79 | 190 | 281 | 0.68 | 0.16101 | 0.00239 |  | 10.53761 | 0.17231 |  | 0.47117 | 0.00460 |  | 2466 | 15 |  | 2483 | 15 |  | 2489 | 20 |
| 15LJ4-11-80 | 35 | 79 | 0.44 | 0.11060 | 0.00235 |  | 4.99485 | 0.11122 |  | 0.32610 | 0.00362 |  | 1809 | 25 |  | 1818 | 19 |  | 1819 | 18 |
| 15LJ4-6 andesite that intrudes the Heisonggou Formation | | | | | | | | | | | | | | | | | | | | |
| 15LJ4-6-01 | 81 | 192 | 0.42 | 0.05267 | 0.00240 |  | 0.35181 | 0.01625 |  | 0.04804 | 0.00055 |  | 315 | 84 |  | 306 | 12 |  | 302 | 3 |
| 15LJ4-6-02 | 286 | 649 | 0.44 | 0.04984 | 0.00163 |  | 0.26721 | 0.00901 |  | 0.03836 | 0.00049 |  | 188 | 55 |  | 240 | 7 |  | 243 | 3 |
| 15LJ4-6-03 | 232 | 516 | 0.45 | 0.05053 | 0.00315 |  | 0.26967 | 0.01667 |  | 0.03877 | 0.00043 |  | 220 | 121 |  | 242 | 13 |  | 245 | 3 |
| 15LJ4-6-04 | 123 | 688 | 0.18 | 0.05193 | 0.00195 |  | 0.34236 | 0.01276 |  | 0.04739 | 0.00044 |  | 282 | 69 |  | 299 | 10 |  | 298 | 3 |
| 15LJ4-6-05 | 336 | 646 | 0.52 | 0.05377 | 0.00213 |  | 0.34275 | 0.01282 |  | 0.04612 | 0.00050 |  | 362 | 65 |  | 299 | 10 |  | 291 | 3 |
| 15LJ4-6-06 | 40 | 555 | 0.07 | 0.11118 | 0.00181 |  | 5.08802 | 0.08427 |  | 0.32902 | 0.00245 |  | 1819 | 19 |  | 1834 | 14 |  | 1834 | 12 |
| 15LJ4-6-07 | 438 | 627 | 0.70 | 0.05447 | 0.00247 |  | 0.28964 | 0.01234 |  | 0.03852 | 0.00040 |  | 390 | 77 |  | 258 | 10 |  | 244 | 2 |
| 15LJ4-6-08 | 275 | 603 | 0.46 | 0.05238 | 0.00268 |  | 0.33604 | 0.01588 |  | 0.04658 | 0.00064 |  | 302 | 83 |  | 294 | 12 |  | 293 | 4 |
| 15LJ4-6-09 | 542 | 977 | 0.55 | 0.05121 | 0.00140 |  | 0.28104 | 0.00759 |  | 0.03966 | 0.00034 |  | 250 | 46 |  | 251 | 6 |  | 251 | 2 |
| 15LJ4-6-10 | 436 | 537 | 0.81 | 0.05236 | 0.00162 |  | 0.30801 | 0.00999 |  | 0.04242 | 0.00044 |  | 301 | 55 |  | 273 | 8 |  | 268 | 3 |
| 15LJ4-6-11 | 415 | 704 | 0.59 | 0.05115 | 0.00153 |  | 0.27715 | 0.00815 |  | 0.03920 | 0.00032 |  | 248 | 53 |  | 248 | 6 |  | 248 | 2 |
| 15LJ4-6-12 | 299 | 1098 | 0.27 | 0.05980 | 0.00151 |  | 0.39038 | 0.01055 |  | 0.04706 | 0.00048 |  | 596 | 41 |  | 335 | 8 |  | 296 | 3 |
| 15LJ4-6-13 | 423 | 734 | 0.58 | 0.04898 | 0.00157 |  | 0.26133 | 0.00819 |  | 0.03871 | 0.00039 |  | 147 | 55 |  | 236 | 7 |  | 245 | 2 |
| 15LJ4-6-14 | 185 | 185 | 1.00 | 0.05012 | 0.00336 |  | 0.27044 | 0.01801 |  | 0.03934 | 0.00065 |  | 200 | 121 |  | 243 | 14 |  | 249 | 4 |
| 15LJ4-6-15 | 246 | 301 | 0.82 | 0.05688 | 0.00416 |  | 0.36954 | 0.02318 |  | 0.04828 | 0.00068 |  | 487 | 114 |  | 319 | 17 |  | 304 | 4 |
| 15LJ4-6-16 | 512 | 901 | 0.57 | 0.06104 | 0.00190 |  | 0.32534 | 0.01022 |  | 0.03860 | 0.00032 |  | 640 | 53 |  | 286 | 8 |  | 244 | 2 |
| 15LJ4-6-17 | 498 | 652 | 0.76 | 0.05427 | 0.00180 |  | 0.37398 | 0.01297 |  | 0.04973 | 0.00046 |  | 382 | 61 |  | 323 | 10 |  | 313 | 3 |
| 15LJ4-6-18 | 99 | 96 | 1.03 | 0.15804 | 0.00312 |  | 10.23473 | 0.23631 |  | 0.46825 | 0.00692 |  | 2435 | 20 |  | 2456 | 21 |  | 2476 | 30 |
| 15LJ4-6-19 | 635 | 854 | 0.74 | 0.15581 | 0.00246 |  | 9.87257 | 0.17156 |  | 0.45738 | 0.00414 |  | 2411 | 17 |  | 2423 | 16 |  | 2428 | 18 |
| 15LJ4-6-20 | 196 | 408 | 0.48 | 0.10933 | 0.00187 |  | 4.89737 | 0.08765 |  | 0.32356 | 0.00264 |  | 1788 | 21 |  | 1802 | 15 |  | 1807 | 13 |
| 16LJ1-1 andesite from the Changbai Formation | | | | | | | | | | | | | | | | | | | | |
| 16LJ1-1-01 | 494 | 677 | 0.73 | 0.05262 | 0.00246 |  | 0.26321 | 0.01240 |  | 0.03609 | 0.00041 |  | 312 | 87 |  | 237 | 10 |  | 229 | 3 |
| 16LJ1-1-02 | 184 | 321 | 0.57 | 0.05338 | 0.00323 |  | 0.25957 | 0.01482 |  | 0.03603 | 0.00059 |  | 345 | 99 |  | 234 | 12 |  | 228 | 4 |
| 16LJ1-1-03 | 241 | 354 | 0.68 | 0.05318 | 0.00346 |  | 0.25702 | 0.01694 |  | 0.03541 | 0.00051 |  | 337 | 124 |  | 232 | 14 |  | 224 | 3 |
| 16LJ1-1-04 | 198 | 345 | 0.57 | 0.05671 | 0.00591 |  | 0.27452 | 0.02816 |  | 0.03511 | 0.00063 |  | 480 | 237 |  | 246 | 22 |  | 222 | 4 |
| 16LJ1-1-05 | 356 | 498 | 0.71 | 0.05207 | 0.00243 |  | 0.25555 | 0.01200 |  | 0.03587 | 0.00046 |  | 288 | 84 |  | 231 | 10 |  | 227 | 3 |
| 16LJ1-1-06 | 220 | 328 | 0.67 | 0.05320 | 0.00306 |  | 0.26510 | 0.01484 |  | 0.03626 | 0.00046 |  | 337 | 104 |  | 239 | 12 |  | 230 | 3 |
| 16LJ1-1-07 | 211 | 291 | 0.72 | 0.05759 | 0.00312 |  | 0.27815 | 0.01446 |  | 0.03539 | 0.00046 |  | 514 | 92 |  | 249 | 11 |  | 224 | 3 |
| 16LJ1-1-08 | 461 | 661 | 0.70 | 0.05195 | 0.00236 |  | 0.25025 | 0.01048 |  | 0.03550 | 0.00042 |  | 283 | 74 |  | 227 | 9 |  | 225 | 3 |
| 16LJ1-1-09 | 788 | 899 | 0.88 | 0.05111 | 0.00173 |  | 0.25150 | 0.00841 |  | 0.03565 | 0.00042 |  | 246 | 55 |  | 228 | 7 |  | 226 | 3 |
| 16LJ1-1-10 | 322 | 534 | 0.60 | 0.05054 | 0.00255 |  | 0.25051 | 0.01272 |  | 0.03616 | 0.00050 |  | 220 | 92 |  | 227 | 10 |  | 229 | 3 |
| 16LJ1-1-11 | 171 | 258 | 0.66 | 0.06309 | 0.00391 |  | 0.29512 | 0.01709 |  | 0.03505 | 0.00062 |  | 711 | 93 |  | 263 | 13 |  | 222 | 4 |
| 16LJ1-1-12 | 482 | 591 | 0.81 | 0.05015 | 0.00229 |  | 0.24916 | 0.01100 |  | 0.03618 | 0.00040 |  | 202 | 82 |  | 226 | 9 |  | 229 | 2 |
| 16LJ1-1-13 | 171 | 277 | 0.62 | 0.05279 | 0.00328 |  | 0.26265 | 0.01586 |  | 0.03645 | 0.00064 |  | 320 | 106 |  | 237 | 13 |  | 231 | 4 |
| 16LJ1-1-14 | 226 | 365 | 0.62 | 0.05021 | 0.00253 |  | 0.24894 | 0.01255 |  | 0.03597 | 0.00053 |  | 205 | 89 |  | 226 | 10 |  | 228 | 3 |
| 16LJ1-1-15 | 342 | 553 | 0.62 | 0.05092 | 0.00226 |  | 0.25562 | 0.01096 |  | 0.03650 | 0.00043 |  | 237 | 77 |  | 231 | 9 |  | 231 | 3 |
| 16LJ1-1-16 | 251 | 386 | 0.65 | 0.05746 | 0.00276 |  | 0.27998 | 0.01373 |  | 0.03526 | 0.00046 |  | 509 | 85 |  | 251 | 11 |  | 223 | 3 |
| 16LJ1-1-17 | 203 | 359 | 0.57 | 0.05097 | 0.00269 |  | 0.24865 | 0.01214 |  | 0.03578 | 0.00051 |  | 239 | 86 |  | 225 | 10 |  | 227 | 3 |
| 16LJ1-1-18 | 166 | 296 | 0.56 | 0.05049 | 0.00396 |  | 0.24579 | 0.01888 |  | 0.03531 | 0.00056 |  | 217 | 179 |  | 223 | 15 |  | 224 | 4 |
| 16LJ1-1-19 | 280 | 499 | 0.56 | 0.05127 | 0.00268 |  | 0.24720 | 0.01225 |  | 0.03546 | 0.00046 |  | 253 | 90 |  | 224 | 10 |  | 225 | 3 |
| 16LJ1-1-20 | 284 | 437 | 0.65 | 0.05334 | 0.00322 |  | 0.26265 | 0.01529 |  | 0.03604 | 0.00048 |  | 343 | 108 |  | 237 | 12 |  | 228 | 3 |
| 16LJ1-1-21 | 159 | 298 | 0.54 | 0.05147 | 0.00267 |  | 0.25119 | 0.01302 |  | 0.03527 | 0.00051 |  | 262 | 93 |  | 228 | 11 |  | 223 | 3 |
| 16LJ1-1-22 | 148 | 322 | 0.46 | 0.06156 | 0.00328 |  | 0.31083 | 0.01775 |  | 0.03607 | 0.00054 |  | 659 | 97 |  | 275 | 14 |  | 228 | 3 |
| 16LJ1-1-23 | 1228 | 1160 | 1.06 | 0.05060 | 0.00193 |  | 0.25115 | 0.00947 |  | 0.03600 | 0.00032 |  | 223 | 71 |  | 228 | 8 |  | 228 | 2 |
| 16LJ1-1-24 | 405 | 581 | 0.70 | 0.05250 | 0.00443 |  | 0.26316 | 0.02259 |  | 0.03638 | 0.00060 |  | 307 | 164 |  | 237 | 18 |  | 230 | 4 |
| 16LJ1-1-25 | 190 | 296 | 0.64 | 0.05351 | 0.00415 |  | 0.26298 | 0.02012 |  | 0.03627 | 0.00066 |  | 351 | 141 |  | 237 | 16 |  | 230 | 4 |
| 15JFS1-1 medium-grained feldspathic quartz sandstone from the Xiaoyingzi Formation | | | | | | | | | | | | | | | | | | | | |
| 15JFS1-1-01 | 146 | 324 | 0.45 | 0.05069 | 0.00241 |  | 0.24664 | 0.01177 |  | 0.03528 | 0.00058 |  | 227 | 80 |  | 224 | 10 |  | 224 | 4 |
| 15JFS1-1-02 | 42 | 229 | 0.19 | 0.11618 | 0.00191 |  | 5.46935 | 0.10101 |  | 0.34137 | 0.00496 |  | 1898 | 15 |  | 1896 | 16 |  | 1893 | 24 |
| 15JFS1-1-03 | 208 | 276 | 0.76 | 0.11179 | 0.00183 |  | 5.15149 | 0.09467 |  | 0.33413 | 0.00484 |  | 1829 | 15 |  | 1845 | 16 |  | 1858 | 23 |
| 15JFS1-1-04 | 79 | 570 | 0.14 | 0.11757 | 0.00184 |  | 5.97718 | 0.10666 |  | 0.36865 | 0.00529 |  | 1920 | 15 |  | 1973 | 16 |  | 2023 | 25 |
| 15JFS1-1-05 | 78 | 152 | 0.51 | 0.05476 | 0.00231 |  | 0.47398 | 0.02001 |  | 0.06276 | 0.00106 |  | 402 | 64 |  | 394 | 14 |  | 392 | 6 |
| 15JFS1-1-06 | 92 | 110 | 0.84 | 0.16424 | 0.00274 |  | 10.55138 | 0.19639 |  | 0.46582 | 0.00685 |  | 2500 | 14 |  | 2484 | 17 |  | 2465 | 30 |
| 15JFS1-1-07 | 75 | 103 | 0.73 | 0.05444 | 0.00360 |  | 0.47736 | 0.03141 |  | 0.06358 | 0.00117 |  | 389 | 115 |  | 396 | 22 |  | 397 | 7 |
| 15JFS1-1-08 | 66 | 359 | 0.18 | 0.11359 | 0.00183 |  | 5.18175 | 0.09446 |  | 0.33078 | 0.00477 |  | 1858 | 15 |  | 1850 | 16 |  | 1842 | 23 |
| 15JFS1-1-09 | 20 | 21 | 0.92 | 0.06624 | 0.00905 |  | 1.06098 | 0.14372 |  | 0.11614 | 0.00291 |  | 814 | 248 |  | 734 | 71 |  | 708 | 17 |
| 15JFS1-1-10 | 170 | 336 | 0.51 | 0.11590 | 0.00189 |  | 5.37919 | 0.09888 |  | 0.33653 | 0.00487 |  | 1894 | 15 |  | 1882 | 16 |  | 1870 | 23 |
| 15JFS1-1-11 | 991 | 872 | 1.14 | 0.05491 | 0.00125 |  | 0.35371 | 0.00850 |  | 0.04671 | 0.00069 |  | 409 | 29 |  | 308 | 6 |  | 294 | 4 |
| 15JFS1-1-12 | 210 | 658 | 0.32 | 0.05323 | 0.00154 |  | 0.29380 | 0.00873 |  | 0.04002 | 0.00062 |  | 339 | 40 |  | 262 | 7 |  | 253 | 4 |
| 15JFS1-1-13 | 68 | 372 | 0.18 | 0.05473 | 0.00255 |  | 0.27527 | 0.01207 |  | 0.03648 | 0.00058 |  | 401 | 107 |  | 247 | 10 |  | 231 | 4 |
| 15JFS1-1-14 | 115 | 259 | 0.44 | 0.11685 | 0.00197 |  | 5.49676 | 0.10341 |  | 0.34109 | 0.00498 |  | 1909 | 16 |  | 1900 | 16 |  | 1892 | 24 |
| 15JFS1-1-15 | 102 | 151 | 0.68 | 0.11507 | 0.00205 |  | 5.21602 | 0.10213 |  | 0.32867 | 0.00487 |  | 1881 | 17 |  | 1855 | 17 |  | 1832 | 24 |
| 15JFS1-1-16 | 229 | 323 | 0.71 | 0.11350 | 0.00191 |  | 5.28385 | 0.09912 |  | 0.33755 | 0.00491 |  | 1856 | 16 |  | 1866 | 16 |  | 1875 | 24 |
| 15JFS1-1-17 | 183 | 404 | 0.45 | 0.11400 | 0.00189 |  | 5.24888 | 0.09778 |  | 0.33387 | 0.00484 |  | 1864 | 16 |  | 1861 | 16 |  | 1857 | 23 |
| 15JFS1-1-18 | 114 | 233 | 0.49 | 0.05181 | 0.00274 |  | 0.29830 | 0.01574 |  | 0.04175 | 0.00072 |  | 277 | 89 |  | 265 | 12 |  | 264 | 4 |
| 15JFS1-1-19 | 98 | 214 | 0.46 | 0.11857 | 0.00206 |  | 5.38233 | 0.10339 |  | 0.32915 | 0.00483 |  | 1935 | 16 |  | 1882 | 16 |  | 1834 | 23 |
| 15JFS1-1-20 | 284 | 454 | 0.62 | 0.05410 | 0.00235 |  | 0.25957 | 0.01129 |  | 0.03479 | 0.00057 |  | 375 | 68 |  | 234 | 9 |  | 220 | 4 |
| 15JFS1-1-21 | 419 | 670 | 0.62 | 0.05948 | 0.00120 |  | 0.75688 | 0.01638 |  | 0.09227 | 0.00135 |  | 585 | 24 |  | 572 | 9 |  | 569 | 8 |
| 15JFS1-1-22 | 155 | 1077 | 0.14 | 0.05367 | 0.00117 |  | 0.37080 | 0.00860 |  | 0.05009 | 0.00074 |  | 357 | 27 |  | 320 | 6 |  | 315 | 5 |
| 15JFS1-1-23 | 39 | 437 | 0.09 | 0.11593 | 0.00195 |  | 5.26424 | 0.09883 |  | 0.32927 | 0.00478 |  | 1894 | 16 |  | 1863 | 16 |  | 1835 | 23 |
| 15JFS1-1-24 | 315 | 595 | 0.53 | 0.05028 | 0.00175 |  | 0.27836 | 0.00980 |  | 0.04014 | 0.00063 |  | 208 | 53 |  | 249 | 8 |  | 254 | 4 |
| 15JFS1-1-25 | 151 | 321 | 0.47 | 0.05110 | 0.00374 |  | 0.24962 | 0.01820 |  | 0.03542 | 0.00063 |  | 245 | 133 |  | 226 | 15 |  | 224 | 4 |
| 15JFS1-1-26 | 71 | 406 | 0.18 | 0.11811 | 0.00207 |  | 5.30414 | 0.10271 |  | 0.32563 | 0.00478 |  | 1928 | 16 |  | 1870 | 17 |  | 1817 | 23 |
| 15JFS1-1-28 | 116 | 113 | 1.02 | 0.12299 | 0.00262 |  | 5.29128 | 0.11884 |  | 0.31195 | 0.00486 |  | 2000 | 20 |  | 1867 | 19 |  | 1750 | 24 |
| 15JFS1-1-29 | 72 | 288 | 0.25 | 0.11620 | 0.00215 |  | 5.30088 | 0.10663 |  | 0.33078 | 0.00493 |  | 1899 | 17 |  | 1869 | 17 |  | 1842 | 24 |
| 15JFS1-1-30 | 67 | 122 | 0.55 | 0.05694 | 0.00325 |  | 0.62806 | 0.03565 |  | 0.07997 | 0.00145 |  | 489 | 93 |  | 495 | 22 |  | 496 | 9 |
| 15JFS1-1-31 | 46 | 211 | 0.22 | 0.12341 | 0.00239 |  | 6.19191 | 0.12927 |  | 0.36382 | 0.00552 |  | 2006 | 18 |  | 2003 | 18 |  | 2000 | 26 |
| 15JFS1-1-32 | 139 | 142 | 0.98 | 0.11791 | 0.00247 |  | 5.38578 | 0.11981 |  | 0.33120 | 0.00507 |  | 1925 | 20 |  | 1883 | 19 |  | 1844 | 25 |
| 15JFS1-1-33 | 329 | 216 | 1.52 | 0.11479 | 0.00223 |  | 5.39286 | 0.11279 |  | 0.34067 | 0.00515 |  | 1877 | 18 |  | 1884 | 18 |  | 1890 | 25 |
| 15JFS1-1-34 | 66 | 299 | 0.22 | 0.11621 | 0.00216 |  | 5.03839 | 0.10201 |  | 0.31436 | 0.00468 |  | 1899 | 17 |  | 1826 | 17 |  | 1762 | 23 |
| 15JFS1-1-35 | 192 | 195 | 0.99 | 0.08176 | 0.00502 |  | 1.27468 | 0.07489 |  | 0.11308 | 0.00202 |  | 1240 | 124 |  | 834 | 33 |  | 691 | 12 |
| 15JFS1-1-36 | 188 | 512 | 0.37 | 0.05210 | 0.00227 |  | 0.25092 | 0.01091 |  | 0.03492 | 0.00059 |  | 290 | 68 |  | 227 | 9 |  | 221 | 4 |
| 15JFS1-1-37 | 118 | 405 | 0.29 | 0.11680 | 0.00215 |  | 5.35743 | 0.10773 |  | 0.33258 | 0.00493 |  | 1908 | 17 |  | 1878 | 17 |  | 1851 | 24 |
| 15JFS1-1-38 | 10 | 33 | 0.31 | 0.11973 | 0.00632 |  | 5.20553 | 0.25610 |  | 0.31533 | 0.00601 |  | 1952 | 97 |  | 1854 | 42 |  | 1767 | 29 |
| 15JFS1-1-39 | 144 | 297 | 0.49 | 0.05078 | 0.00449 |  | 0.24633 | 0.02163 |  | 0.03517 | 0.00069 |  | 231 | 162 |  | 224 | 18 |  | 223 | 4 |
| 15JFS1-1-40 | 371 | 876 | 0.42 | 0.06422 | 0.00184 |  | 0.38655 | 0.01136 |  | 0.04365 | 0.00068 |  | 749 | 36 |  | 332 | 8 |  | 275 | 4 |
| 15JFS1-1-41 | 103 | 107 | 0.96 | 0.14118 | 0.00318 |  | 6.94952 | 0.16306 |  | 0.35692 | 0.00574 |  | 2242 | 20 |  | 2105 | 21 |  | 1968 | 27 |
| 15JFS1-1-42 | 52 | 485 | 0.11 | 0.11386 | 0.00207 |  | 5.51932 | 0.11002 |  | 0.35150 | 0.00518 |  | 1862 | 17 |  | 1904 | 17 |  | 1942 | 25 |
| 15JFS1-1-43 | 278 | 498 | 0.56 | 0.11297 | 0.00207 |  | 5.31815 | 0.10673 |  | 0.34134 | 0.00503 |  | 1848 | 17 |  | 1872 | 17 |  | 1893 | 24 |
| 15JFS1-1-44 | 247 | 489 | 0.51 | 0.11107 | 0.00205 |  | 4.93781 | 0.09942 |  | 0.32236 | 0.00476 |  | 1817 | 17 |  | 1809 | 17 |  | 1801 | 23 |
| 15JFS1-1-45 | 137 | 886 | 0.15 | 0.05353 | 0.00155 |  | 0.43498 | 0.01286 |  | 0.05893 | 0.00093 |  | 351 | 39 |  | 367 | 9 |  | 369 | 6 |
| 15JFS1-1-46 | 119 | 743 | 0.16 | 0.05182 | 0.00182 |  | 0.31324 | 0.01114 |  | 0.04384 | 0.00069 |  | 277 | 53 |  | 277 | 9 |  | 277 | 4 |
| 15JFS1-1-47 | 747 | 946 | 0.79 | 0.05726 | 0.00143 |  | 0.57483 | 0.01494 |  | 0.07280 | 0.00110 |  | 502 | 32 |  | 461 | 10 |  | 453 | 7 |
| 15JFS1-1-48 | 268 | 1084 | 0.25 | 0.06428 | 0.00264 |  | 0.61502 | 0.02335 |  | 0.06940 | 0.00108 |  | 751 | 89 |  | 487 | 15 |  | 433 | 6 |
| 15JFS1-1-49 | 64 | 464 | 0.14 | 0.10813 | 0.00209 |  | 4.44022 | 0.09260 |  | 0.29776 | 0.00445 |  | 1768 | 18 |  | 1720 | 17 |  | 1680 | 22 |
| 15JFS1-1-50 | 145 | 405 | 0.36 | 0.11480 | 0.00217 |  | 5.10929 | 0.10509 |  | 0.32271 | 0.00480 |  | 1877 | 18 |  | 1838 | 17 |  | 1803 | 23 |
| 15JFS1-1-51 | 220 | 353 | 0.62 | 0.12029 | 0.00238 |  | 5.63695 | 0.11970 |  | 0.33979 | 0.00514 |  | 1961 | 18 |  | 1922 | 18 |  | 1886 | 25 |
| 15JFS1-1-52 | 49 | 352 | 0.14 | 0.11609 | 0.00228 |  | 5.41033 | 0.11445 |  | 0.33793 | 0.00508 |  | 1897 | 18 |  | 1886 | 18 |  | 1877 | 24 |
| 15JFS1-1-53 | 68 | 550 | 0.12 | 0.11736 | 0.00223 |  | 5.32595 | 0.10992 |  | 0.32907 | 0.00489 |  | 1916 | 18 |  | 1873 | 18 |  | 1834 | 24 |
| 15JFS1-1-54 | 95 | 389 | 0.25 | 0.11689 | 0.00228 |  | 5.40980 | 0.11369 |  | 0.33557 | 0.00503 |  | 1909 | 18 |  | 1886 | 18 |  | 1865 | 24 |
| 15JFS1-1-55 | 62 | 126 | 0.49 | 0.11343 | 0.00266 |  | 5.23096 | 0.12758 |  | 0.33440 | 0.00530 |  | 1855 | 23 |  | 1858 | 21 |  | 1860 | 26 |
| 15JFS1-1-56 | 281 | 353 | 0.79 | 0.05061 | 0.00387 |  | 0.25328 | 0.01927 |  | 0.03629 | 0.00068 |  | 223 | 138 |  | 229 | 16 |  | 230 | 4 |
| 15JFS1-1-57 | 166 | 322 | 0.52 | 0.05213 | 0.00381 |  | 0.26526 | 0.01933 |  | 0.03689 | 0.00066 |  | 291 | 134 |  | 239 | 16 |  | 234 | 4 |
| 15JFS1-1-58 | 200 | 609 | 0.33 | 0.11411 | 0.00218 |  | 5.33927 | 0.11092 |  | 0.33929 | 0.00504 |  | 1866 | 18 |  | 1875 | 18 |  | 1883 | 24 |
| 15JFS1-1-59 | 193 | 408 | 0.47 | 0.05411 | 0.00212 |  | 0.43360 | 0.01712 |  | 0.05810 | 0.00095 |  | 376 | 59 |  | 366 | 12 |  | 364 | 6 |
| 15JFS1-1-60 | 104 | 171 | 0.61 | 0.11516 | 0.00260 |  | 5.43201 | 0.12821 |  | 0.34204 | 0.00540 |  | 1882 | 21 |  | 1890 | 20 |  | 1896 | 26 |
| 15JFS1-1-61 | 91 | 103 | 0.88 | 0.11381 | 0.00270 |  | 5.32542 | 0.13117 |  | 0.33929 | 0.00544 |  | 1861 | 23 |  | 1873 | 21 |  | 1883 | 26 |
| 15JFS1-1-62 | 42 | 902 | 0.05 | 0.11233 | 0.00214 |  | 5.25236 | 0.10876 |  | 0.33905 | 0.00501 |  | 1837 | 18 |  | 1861 | 18 |  | 1882 | 24 |
| 15JFS1-1-63 | 142 | 366 | 0.39 | 0.11588 | 0.00237 |  | 4.93162 | 0.10772 |  | 0.30859 | 0.00468 |  | 1894 | 19 |  | 1808 | 18 |  | 1734 | 23 |
| 15JFS1-1-64 | 181 | 374 | 0.48 | 0.05077 | 0.00279 |  | 0.25127 | 0.01369 |  | 0.03589 | 0.00066 |  | 230 | 92 |  | 228 | 11 |  | 227 | 4 |
| 15JFS1-1-65 | 112 | 97 | 1.15 | 0.11331 | 0.00295 |  | 5.27139 | 0.14056 |  | 0.33732 | 0.00554 |  | 1853 | 26 |  | 1864 | 23 |  | 1874 | 27 |
| 15JFS1-1-66 | 48 | 108 | 0.45 | 0.26649 | 0.00556 |  | 22.99398 | 0.50865 |  | 0.62566 | 0.01000 |  | 3285 | 17 |  | 3227 | 22 |  | 3132 | 40 |
| 15JFS1-1-67 | 10 | 359 | 0.03 | 0.05236 | 0.00208 |  | 0.33979 | 0.01351 |  | 0.04706 | 0.00079 |  | 301 | 60 |  | 297 | 10 |  | 296 | 5 |
| 15JFS1-1-68 | 271 | 749 | 0.36 | 0.11697 | 0.00229 |  | 5.66214 | 0.11986 |  | 0.35100 | 0.00523 |  | 1910 | 19 |  | 1926 | 18 |  | 1939 | 25 |
| 15JFS1-1-69 | 138 | 363 | 0.38 | 0.11414 | 0.00228 |  | 5.17176 | 0.11128 |  | 0.32854 | 0.00493 |  | 1866 | 19 |  | 1848 | 18 |  | 1831 | 24 |
| 15JFS1-1-70 | 128 | 304 | 0.42 | 0.11176 | 0.00225 |  | 5.20815 | 0.11282 |  | 0.33790 | 0.00508 |  | 1828 | 19 |  | 1854 | 18 |  | 1877 | 24 |
| 15JFS1-1-71 | 107 | 314 | 0.34 | 0.11257 | 0.00229 |  | 5.22120 | 0.11369 |  | 0.33631 | 0.00506 |  | 1841 | 19 |  | 1856 | 19 |  | 1869 | 24 |
| 15JFS1-1-72 | 213 | 455 | 0.47 | 0.05065 | 0.00231 |  | 0.24934 | 0.01140 |  | 0.03569 | 0.00059 |  | 225 | 75 |  | 226 | 9 |  | 226 | 4 |
| 15JFS1-1-73 | 211 | 432 | 0.49 | 0.15801 | 0.00312 |  | 9.83172 | 0.20989 |  | 0.45119 | 0.00673 |  | 2434 | 18 |  | 2419 | 20 |  | 2401 | 30 |
| 15JFS1-1-74 | 84 | 139 | 0.60 | 0.11473 | 0.00275 |  | 5.18713 | 0.12939 |  | 0.32784 | 0.00517 |  | 1876 | 24 |  | 1851 | 21 |  | 1828 | 25 |
| 15JFS1-1-75 | 156 | 536 | 0.29 | 0.11406 | 0.00230 |  | 5.39793 | 0.11722 |  | 0.34317 | 0.00514 |  | 1865 | 19 |  | 1885 | 19 |  | 1902 | 25 |
| 15JFS1-1-76 | 213 | 244 | 0.87 | 0.11721 | 0.00249 |  | 5.43261 | 0.12275 |  | 0.33608 | 0.00514 |  | 1914 | 20 |  | 1890 | 19 |  | 1868 | 25 |
| 15JFS1-1-77 | 43 | 284 | 0.15 | 0.11451 | 0.00242 |  | 4.97001 | 0.11184 |  | 0.31472 | 0.00478 |  | 1872 | 20 |  | 1814 | 19 |  | 1764 | 23 |
| 15JFS1-1-78 | 101 | 934 | 0.11 | 0.11280 | 0.00231 |  | 5.27361 | 0.11583 |  | 0.33900 | 0.00510 |  | 1845 | 20 |  | 1865 | 19 |  | 1882 | 25 |
| 15JFS1-1-79 | 193 | 289 | 0.67 | 0.11467 | 0.00249 |  | 5.10212 | 0.11706 |  | 0.32263 | 0.00495 |  | 1875 | 21 |  | 1836 | 19 |  | 1803 | 24 |
| 15JFS1-1-80 | 213 | 135 | 1.58 | 0.11423 | 0.00288 |  | 5.25825 | 0.13683 |  | 0.33377 | 0.00537 |  | 1868 | 25 |  | 1862 | 22 |  | 1857 | 26 |
| 15JFS2-1 diabase porphyrite that intrudes the Xiaoyingzi Formation | | | | | | | | | | | | | | | | | | | | |
| 15JFS2-1-1 | 475 | 1816 | 0.26 | 0.04824 | 0.62569 |  | 0.11945 | 1.62692 |  | 0.01796 | 1.50179 |  | 111 | 15 |  | 115 | 2 |  | 115 | 2 |
| 15JFS2-1-2 | 787 | 629 | 1.25 | 0.04938 | 1.30382 |  | 0.11834 | 2.00525 |  | 0.01738 | 1.52351 |  | 166 | 30 |  | 114 | 2 |  | 111 | 2 |
| 15JFS2-1-3 | 79 | 247 | 0.32 | 0.04959 | 1.65467 |  | 0.11830 | 2.39812 |  | 0.01730 | 1.73582 |  | 176 | 38 |  | 114 | 3 |  | 111 | 2 |
| 15JFS2-1-5 | 242 | 370 | 0.66 | 0.05274 | 0.78592 |  | 0.38460 | 1.71813 |  | 0.05288 | 1.52784 |  | 318 | 18 |  | 330 | 5 |  | 332 | 5 |
| 15JFS2-1-6 | 184 | 511 | 0.36 | 0.11386 | 0.66775 |  | 4.71608 | 1.78917 |  | 0.30042 | 1.65989 |  | 1862 | 12 |  | 1770 | 15 |  | 1693 | 25 |
| 15JFS2-1-7 | 9 | 151 | 0.06 | 0.15588 | 2.52792 |  | 9.15629 | 3.36518 |  | 0.42601 | 2.22128 |  | 2411 | 42 |  | 2354 | 31 |  | 2288 | 43 |
| 15JFS2-1-11 | 1377 | 1194 | 1.15 | 0.04782 | 0.98015 |  | 0.11582 | 1.82982 |  | 0.01756 | 1.54517 |  | 90 | 23 |  | 111 | 2 |  | 112 | 2 |
| 15JFS2-1-12 | 463 | 478 | 0.97 | 0.16584 | 0.58918 |  | 9.88751 | 1.72705 |  | 0.43241 | 1.62344 |  | 2516 | 10 |  | 2424 | 16 |  | 2317 | 32 |
| 15JFS2-1-13 | 89 | 432 | 0.21 | 0.12713 | 2.35337 |  | 5.85458 | 3.54902 |  | 0.33400 | 2.65653 |  | 2059 | 41 |  | 1955 | 31 |  | 1858 | 43 |
| 15JFS2-1-14 | 712 | 822 | 0.87 | 0.04852 | 0.71676 |  | 0.18173 | 1.96393 |  | 0.02717 | 1.82846 |  | 125 | 17 |  | 170 | 3 |  | 173 | 3 |
| 15JFS2-1-15 | 798 | 796 | 1.00 | 0.04987 | 1.07645 |  | 0.29370 | 1.97474 |  | 0.04271 | 1.65555 |  | 189 | 25 |  | 261 | 5 |  | 270 | 4 |
| 15JFS2-1-16 | 44 | 569 | 0.08 | 0.11524 | 0.17049 |  | 5.39169 | 1.55125 |  | 0.33931 | 1.54185 |  | 1884 | 3 |  | 1884 | 13 |  | 1883 | 25 |
| 15JFS2-1-17 | 628 | 326 | 1.92 | 0.06447 | 0.64662 |  | 1.08702 | 1.65692 |  | 0.12229 | 1.52553 |  | 757 | 14 |  | 747 | 9 |  | 744 | 11 |
| 15JFS2-1-18 | 60 | 295 | 0.20 | 0.11571 | 0.37056 |  | 5.40401 | 1.69103 |  | 0.33873 | 1.64993 |  | 1891 | 7 |  | 1885 | 15 |  | 1881 | 27 |
| 15JFS2-1-19 | 534 | 1414 | 0.38 | 0.05094 | 0.59338 |  | 0.24199 | 1.68069 |  | 0.03445 | 1.57246 |  | 238 | 14 |  | 220 | 3 |  | 218 | 3 |
| 15JFS2-1-20 | 779 | 824 | 0.95 | 0.04684 | 1.43783 |  | 0.12011 | 2.13075 |  | 0.01860 | 1.57249 |  | 41 | 34 |  | 115 | 2 |  | 119 | 2 |
| 15JFS2-1-22 | 96 | 297 | 0.32 | 0.11548 | 0.27800 |  | 5.00215 | 1.52620 |  | 0.31416 | 1.50066 |  | 1887 | 5 |  | 1820 | 13 |  | 1761 | 23 |
| 16LJ8-1 tuffaceous siltstone from the Xiaoyingzi Formation | | | | | | | | | | | | | | | | | | | | |
| 16LJ8-1-01 | 198 | 3693 | 0.05 | 0.12272 | 0.00174 |  | 2.97098 | 0.05052 |  | 0.17421 | 0.00175 |  | 1950 | 36 |  | 1371 | 13 |  | 1030 | 9 |
| 16LJ8-1-02 | 26 | 52 | 0.50 | 0.15563 | 0.00420 |  | 10.07145 | 0.27116 |  | 0.47093 | 0.00705 |  | 2409 | 26 |  | 2441 | 25 |  | 2488 | 31 |
| 16LJ8-1-03 | 97 | 413 | 0.23 | 0.11118 | 0.00201 |  | 5.41101 | 0.09702 |  | 0.35170 | 0.00305 |  | 1819 | 20 |  | 1887 | 15 |  | 1943 | 15 |
| 16LJ8-1-04 | 362 | 1107 | 0.33 | 0.04886 | 0.00182 |  | 0.23747 | 0.00908 |  | 0.03512 | 0.00036 |  | 141 | 70 |  | 216 | 7 |  | 223 | 2 |
| 16LJ8-1-05 | 280 | 3933 | 0.07 | 0.10598 | 0.00167 |  | 4.56438 | 0.08128 |  | 0.31009 | 0.00335 |  | 1731 | 18 |  | 1743 | 15 |  | 1741 | 16 |
| 16LJ8-1-06 | 189 | 958 | 0.20 | 0.10907 | 0.00197 |  | 5.10720 | 0.09508 |  | 0.33708 | 0.00298 |  | 1784 | 21 |  | 1837 | 16 |  | 1873 | 14 |
| 16LJ8-1-07 | 799 | 2112 | 0.38 | 0.13830 | 0.00242 |  | 6.27847 | 0.10622 |  | 0.32706 | 0.00223 |  | 2206 | 20 |  | 2015 | 15 |  | 1824 | 11 |
| 16LJ8-1-08 | 1084 | 2466 | 0.44 | 0.05026 | 0.00114 |  | 0.29091 | 0.00662 |  | 0.04183 | 0.00037 |  | 207 | 36 |  | 259 | 5 |  | 264 | 2 |
| 16LJ8-1-09 | 897 | 1740 | 0.52 | 0.05062 | 0.00142 |  | 0.29238 | 0.00894 |  | 0.04162 | 0.00044 |  | 224 | 51 |  | 260 | 7 |  | 263 | 3 |
| 16LJ8-1-10 | 625 | 1072 | 0.58 | 0.13357 | 0.00225 |  | 7.17625 | 0.11621 |  | 0.38877 | 0.00290 |  | 2145 | 18 |  | 2134 | 14 |  | 2117 | 13 |
| 16LJ8-1-11 | 595 | 1166 | 0.51 | 0.04993 | 0.00173 |  | 0.24999 | 0.00837 |  | 0.03641 | 0.00038 |  | 192 | 59 |  | 227 | 7 |  | 231 | 2 |
| 16LJ8-1-13 | 287 | 536 | 0.54 | 0.13789 | 0.00238 |  | 8.08755 | 0.15851 |  | 0.42334 | 0.00443 |  | 2201 | 20 |  | 2241 | 18 |  | 2276 | 20 |
| 16LJ8-1-14 | 365 | 1283 | 0.28 | 0.10986 | 0.00166 |  | 5.04462 | 0.08337 |  | 0.33121 | 0.00296 |  | 1797 | 17 |  | 1827 | 14 |  | 1844 | 14 |
| 16LJ8-1-15 | 547 | 869 | 0.63 | 0.05133 | 0.00200 |  | 0.26893 | 0.01039 |  | 0.03792 | 0.00040 |  | 256 | 70 |  | 242 | 8 |  | 240 | 2 |
| 16LJ8-1-16 | 559 | 1094 | 0.51 | 0.11345 | 0.00182 |  | 3.59842 | 0.08291 |  | 0.22853 | 0.00427 |  | 1855 | 19 |  | 1549 | 18 |  | 1327 | 22 |
| 16LJ8-1-17 | 117 | 974 | 0.12 | 0.17013 | 0.00278 |  | 11.57108 | 0.31012 |  | 0.48463 | 0.01015 |  | 2559 | 21 |  | 2570 | 25 |  | 2547 | 44 |
| 16LJ8-1-18 | 179 | 1059 | 0.17 | 0.11202 | 0.00207 |  | 5.22798 | 0.09447 |  | 0.33467 | 0.00303 |  | 1832 | 20 |  | 1857 | 15 |  | 1861 | 15 |
| 16LJ8-1-19 | 263 | 310 | 0.85 | 0.16080 | 0.00326 |  | 10.75424 | 0.22629 |  | 0.47974 | 0.00572 |  | 2464 | 20 |  | 2502 | 20 |  | 2526 | 25 |
| 16LJ8-1-20 | 144 | 271 | 0.53 | 0.11429 | 0.00250 |  | 4.92955 | 0.10024 |  | 0.31021 | 0.00265 |  | 1869 | 24 |  | 1807 | 17 |  | 1742 | 13 |
| 16LJ8-1-21 | 132 | 1534 | 0.09 | 0.11248 | 0.00176 |  | 5.26119 | 0.08193 |  | 0.33520 | 0.00259 |  | 1840 | 17 |  | 1863 | 13 |  | 1864 | 13 |
| 16LJ8-1-22 | 86 | 2053 | 0.04 | 0.11104 | 0.00165 |  | 5.50730 | 0.09941 |  | 0.35560 | 0.00450 |  | 1817 | 16 |  | 1902 | 16 |  | 1961 | 21 |
| 16LJ8-1-23 | 627 | 1242 | 0.50 | 0.10971 | 0.00185 |  | 4.64199 | 0.07564 |  | 0.30347 | 0.00204 |  | 1795 | 20 |  | 1757 | 14 |  | 1709 | 10 |
| 16LJ8-1-24 | 1466 | 3682 | 0.40 | 0.05049 | 0.00119 |  | 0.28199 | 0.00611 |  | 0.04029 | 0.00037 |  | 218 | 33 |  | 252 | 5 |  | 255 | 2 |
| 16LJ8-1-25 | 246 | 421 | 0.58 | 0.14099 | 0.00268 |  | 8.39268 | 0.16288 |  | 0.42795 | 0.00449 |  | 2239 | 19 |  | 2274 | 18 |  | 2296 | 20 |
| 16LJ8-1-26 | 643 | 1201 | 0.54 | 0.11593 | 0.00201 |  | 5.35806 | 0.11125 |  | 0.33441 | 0.00569 |  | 1894 | 17 |  | 1878 | 18 |  | 1860 | 27 |
| 16LJ8-1-27 | 1063 | 886 | 1.20 | 0.07331 | 0.00164 |  | 1.55149 | 0.03551 |  | 0.15229 | 0.00137 |  | 1022 | 32 |  | 951 | 14 |  | 914 | 8 |
| 16LJ8-1-28 | 1044 | 1783 | 0.59 | 0.10916 | 0.00164 |  | 4.67087 | 0.06923 |  | 0.30776 | 0.00195 |  | 1786 | 18 |  | 1762 | 12 |  | 1730 | 10 |
| 16LJ8-1-29 | 250 | 242 | 1.03 | 0.14569 | 0.00288 |  | 8.73042 | 0.17901 |  | 0.43173 | 0.00436 |  | 2296 | 22 |  | 2310 | 19 |  | 2314 | 20 |
| 16LJ8-1-30 | 1615 | 2927 | 0.55 | 0.05109 | 0.00119 |  | 0.26842 | 0.00641 |  | 0.03787 | 0.00035 |  | 245 | 38 |  | 241 | 5 |  | 240 | 2 |
| 16LJ8-1-33 | 550 | 1109 | 0.50 | 0.12726 | 0.00301 |  | 6.60786 | 0.10816 |  | 0.37904 | 0.00422 |  | 2061 | 14 |  | 2060 | 14 |  | 2072 | 20 |
| 16LJ8-1-34 | 277 | 1348 | 0.21 | 0.10943 | 0.00163 |  | 5.00293 | 0.07367 |  | 0.32975 | 0.00276 |  | 1790 | 15 |  | 1820 | 12 |  | 1837 | 13 |
| 16LJ8-1-36 | 818 | 2506 | 0.33 | 0.10642 | 0.00176 |  | 5.24011 | 0.08702 |  | 0.35406 | 0.00282 |  | 1739 | 19 |  | 1859 | 14 |  | 1954 | 13 |
| 16LJ8-1-37 | 670 | 1474 | 0.45 | 0.10697 | 0.00184 |  | 5.16736 | 0.09117 |  | 0.34747 | 0.00320 |  | 1748 | 19 |  | 1847 | 15 |  | 1923 | 15 |
| 16LJ8-1-38 | 186 | 3058 | 0.06 | 0.10432 | 0.00176 |  | 4.06014 | 0.10369 |  | 0.27821 | 0.00461 |  | 1702 | 24 |  | 1646 | 21 |  | 1582 | 23 |
| 16LJ8-1-39 | 28 | 378 | 0.07 | 0.09657 | 0.00236 |  | 2.66967 | 0.06542 |  | 0.19924 | 0.00204 |  | 1469 | 53 |  | 1275 | 18 |  | 1164 | 11 |
| 16LJ8-1-40 | 507 | 734 | 0.70 | 0.10639 | 0.00175 |  | 5.10103 | 0.08655 |  | 0.34497 | 0.00260 |  | 1739 | 20 |  | 1836 | 14 |  | 1911 | 12 |
| 16LJ8-1-41 | 223 | 684 | 0.33 | 0.17457 | 0.00264 |  | 12.26542 | 0.18317 |  | 0.50594 | 0.00365 |  | 2602 | 15 |  | 2625 | 14 |  | 2639 | 16 |
| 16LJ8-1-42 | 151 | 523 | 0.29 | 0.10710 | 0.00203 |  | 5.01466 | 0.09565 |  | 0.33792 | 0.00347 |  | 1751 | 20 |  | 1822 | 16 |  | 1877 | 17 |
| 16LJ8-1-43 | 230 | 348 | 0.66 | 0.05363 | 0.00287 |  | 0.36816 | 0.01904 |  | 0.05026 | 0.00070 |  | 356 | 92 |  | 318 | 14 |  | 316 | 4 |
| 16LJ8-1-44 | 589 | 1285 | 0.46 | 0.05024 | 0.00182 |  | 0.24750 | 0.00892 |  | 0.03568 | 0.00035 |  | 206 | 66 |  | 225 | 7 |  | 226 | 2 |
| 16LJ8-1-45 | 262 | 406 | 0.64 | 0.11111 | 0.00203 |  | 4.58886 | 0.08880 |  | 0.29787 | 0.00296 |  | 1818 | 21 |  | 1747 | 16 |  | 1681 | 15 |
| 16LJ8-1-46 | 448 | 554 | 0.81 | 0.10897 | 0.00178 |  | 5.05552 | 0.08230 |  | 0.33509 | 0.00291 |  | 1782 | 17 |  | 1829 | 14 |  | 1863 | 14 |
| 16LJ8-1-47 | 91 | 187 | 0.49 | 0.05232 | 0.00344 |  | 0.28841 | 0.01714 |  | 0.04043 | 0.00068 |  | 299 | 105 |  | 257 | 14 |  | 256 | 4 |
| 16LJ8-1-48 | 92 | 305 | 0.30 | 0.16139 | 0.00253 |  | 10.77958 | 0.20045 |  | 0.48030 | 0.00493 |  | 2470 | 18 |  | 2504 | 17 |  | 2529 | 21 |
| 16LJ8-1-49 | 229 | 370 | 0.62 | 0.15888 | 0.00290 |  | 10.70759 | 0.20316 |  | 0.48427 | 0.00502 |  | 2444 | 18 |  | 2498 | 18 |  | 2546 | 22 |
| 16LJ8-1-50 | 174 | 737 | 0.24 | 0.11119 | 0.00187 |  | 5.34705 | 0.09645 |  | 0.34551 | 0.00347 |  | 1819 | 19 |  | 1876 | 15 |  | 1913 | 17 |
| 16LJ8-1-51 | 377 | 1735 | 0.22 | 0.11120 | 0.00164 |  | 5.18706 | 0.07156 |  | 0.33552 | 0.00225 |  | 1819 | 15 |  | 1850 | 12 |  | 1865 | 11 |
| 16LJ8-1-52 | 201 | 961 | 0.21 | 0.11011 | 0.00166 |  | 5.23758 | 0.08549 |  | 0.34165 | 0.00308 |  | 1801 | 17 |  | 1859 | 14 |  | 1895 | 15 |
| 16LJ8-1-53 | 212 | 425 | 0.50 | 0.05647 | 0.00187 |  | 0.63733 | 0.02095 |  | 0.08146 | 0.00081 |  | 471 | 55 |  | 501 | 13 |  | 505 | 5 |
| 16LJ8-1-54 | 474 | 775 | 0.62 | 0.10955 | 0.00207 |  | 4.67423 | 0.08347 |  | 0.30745 | 0.00265 |  | 1792 | 20 |  | 1763 | 15 |  | 1728 | 13 |
| 16LJ8-1-55 | 23 | 598 | 0.04 | 0.17090 | 0.00298 |  | 11.92700 | 0.20428 |  | 0.50186 | 0.00401 |  | 2566 | 18 |  | 2599 | 16 |  | 2622 | 17 |
| 16LJ8-1-56 | 225 | 1855 | 0.12 | 0.11407 | 0.00181 |  | 5.12063 | 0.10568 |  | 0.32282 | 0.00494 |  | 1865 | 18 |  | 1840 | 18 |  | 1803 | 24 |
| 16LJ8-1-58 | 528 | 1246 | 0.42 | 0.10714 | 0.00170 |  | 5.05663 | 0.08244 |  | 0.33939 | 0.00281 |  | 1751 | 18 |  | 1829 | 14 |  | 1884 | 14 |
| 16LJ8-1-59 | 428 | 890 | 0.48 | 0.05105 | 0.00194 |  | 0.28249 | 0.01056 |  | 0.03989 | 0.00041 |  | 243 | 67 |  | 253 | 8 |  | 252 | 3 |
| 16LJ8-1-60 | 628 | 2588 | 0.24 | 0.10853 | 0.00214 |  | 4.84197 | 0.10439 |  | 0.32063 | 0.00382 |  | 1775 | 22 |  | 1792 | 18 |  | 1793 | 19 |
| 16LJ8-1-61 | 92 | 1535 | 0.06 | 0.10890 | 0.00215 |  | 5.36754 | 0.11593 |  | 0.35448 | 0.00432 |  | 1781 | 22 |  | 1880 | 18 |  | 1956 | 21 |
| 16LJ8-1-62 | 213 | 238 | 0.90 | 0.16021 | 0.00304 |  | 10.84503 | 0.21285 |  | 0.48739 | 0.00477 |  | 2458 | 20 |  | 2510 | 18 |  | 2559 | 21 |
| 16LJ8-1-63 | 346 | 881 | 0.40 | 0.10945 | 0.00177 |  | 5.15459 | 0.09024 |  | 0.33897 | 0.00337 |  | 1790 | 18 |  | 1845 | 15 |  | 1882 | 16 |
| 16LJ8-1-64 | 345 | 336 | 1.02 | 0.11101 | 0.00195 |  | 5.29510 | 0.09391 |  | 0.34382 | 0.00316 |  | 1816 | 19 |  | 1868 | 15 |  | 1905 | 15 |
| 16LJ8-1-65 | 653 | 1761 | 0.40 | 0.11150 | 0.00178 |  | 4.51740 | 0.07168 |  | 0.29168 | 0.00229 |  | 1824 | 18 |  | 1734 | 13 |  | 1650 | 11 |
| 16LJ8-1-66 | 1038 | 1858 | 0.56 | 0.11015 | 0.00193 |  | 4.61603 | 0.07784 |  | 0.30188 | 0.00214 |  | 1802 | 20 |  | 1752 | 14 |  | 1701 | 11 |
| 16LJ8-1-67 | 287 | 410 | 0.70 | 0.05367 | 0.00245 |  | 0.38748 | 0.01692 |  | 0.05259 | 0.00057 |  | 357 | 79 |  | 333 | 12 |  | 330 | 4 |
| 16LJ8-1-68 | 787 | 1543 | 0.50 | 0.11102 | 0.00183 |  | 4.68797 | 0.07631 |  | 0.30432 | 0.00210 |  | 1816 | 20 |  | 1765 | 14 |  | 1713 | 10 |
| 16LJ8-1-69 | 988 | 2418 | 0.41 | 0.12457 | 0.00183 |  | 4.83634 | 0.07638 |  | 0.27950 | 0.00207 |  | 2023 | 18 |  | 1791 | 13 |  | 1589 | 10 |
| 16LJ8-1-70 | 573 | 1457 | 0.40 | 0.10912 | 0.00164 |  | 4.98119 | 0.07913 |  | 0.32910 | 0.00268 |  | 1785 | 17 |  | 1816 | 13 |  | 1834 | 13 |
| 15LJ1-2 fine-grained feldspathic quartz sandstone from the Yihe Formation | | | | | | | | | | | | | | | | | | | | |
| 15LJ1-2-01 | 233 | 390 | 0.60 | 0.05187 | 0.00164 |  | 0.27031 | 0.00802 |  | 0.03810 | 0.00045 |  | 279 | 46 |  | 243 | 6 |  | 241 | 3 |
| 15LJ1-2-02 | 199 | 420 | 0.47 | 0.05196 | 0.00194 |  | 0.29730 | 0.01089 |  | 0.04145 | 0.00051 |  | 284 | 61 |  | 264 | 9 |  | 262 | 3 |
| 15LJ1-2-03 | 108 | 158 | 0.69 | 0.04665 | 0.00378 |  | 0.18228 | 0.01244 |  | 0.02924 | 0.00057 |  | 31 | 111 |  | 170 | 11 |  | 186 | 4 |
| 15LJ1-2-04 | 1165 | 676 | 1.72 | 0.05302 | 0.00134 |  | 0.28026 | 0.00694 |  | 0.03825 | 0.00039 |  | 330 | 38 |  | 251 | 6 |  | 242 | 2 |
| 15LJ1-2-05 | 63 | 68 | 0.93 | 0.05113 | 0.00400 |  | 0.25913 | 0.01902 |  | 0.03723 | 0.00093 |  | 247 | 122 |  | 234 | 15 |  | 236 | 6 |
| 15LJ1-2-06 | 41 | 285 | 0.14 | 0.10918 | 0.00182 |  | 4.48645 | 0.07850 |  | 0.29601 | 0.00341 |  | 1786 | 16 |  | 1728 | 15 |  | 1671 | 17 |
| 15LJ1-2-07 | 79 | 100 | 0.79 | 0.05448 | 0.00436 |  | 0.28924 | 0.01831 |  | 0.04043 | 0.00089 |  | 391 | 102 |  | 258 | 14 |  | 256 | 6 |
| 15LJ1-2-08 | 394 | 502 | 0.79 | 0.05086 | 0.00186 |  | 0.26965 | 0.00991 |  | 0.03825 | 0.00063 |  | 234 | 54 |  | 242 | 8 |  | 242 | 4 |
| 15LJ1-2-09 | 266 | 896 | 0.30 | 0.05295 | 0.00111 |  | 0.31460 | 0.00678 |  | 0.04275 | 0.00046 |  | 327 | 30 |  | 278 | 5 |  | 270 | 3 |
| 15LJ1-2-10 | 102 | 163 | 0.62 | 0.05629 | 0.00206 |  | 0.57569 | 0.02063 |  | 0.07397 | 0.00117 |  | 464 | 51 |  | 462 | 13 |  | 460 | 7 |
| 15LJ1-2-11 | 491 | 840 | 0.58 | 0.05137 | 0.00101 |  | 0.27537 | 0.00537 |  | 0.03866 | 0.00037 |  | 257 | 27 |  | 247 | 4 |  | 245 | 2 |
| 15LJ1-2-12 | 361 | 471 | 0.77 | 0.05055 | 0.00158 |  | 0.23228 | 0.00714 |  | 0.03324 | 0.00036 |  | 221 | 51 |  | 212 | 6 |  | 211 | 2 |
| 15LJ1-2-14 | 317 | 608 | 0.52 | 0.05375 | 0.00130 |  | 0.29666 | 0.00739 |  | 0.03980 | 0.00051 |  | 361 | 34 |  | 264 | 6 |  | 252 | 3 |
| 15LJ1-2-15 | 521 | 925 | 0.56 | 0.05096 | 0.00110 |  | 0.27801 | 0.00590 |  | 0.03944 | 0.00036 |  | 239 | 32 |  | 249 | 5 |  | 249 | 2 |
| 15LJ1-2-16 | 258 | 377 | 0.68 | 0.05035 | 0.00170 |  | 0.19726 | 0.00655 |  | 0.02856 | 0.00035 |  | 211 | 54 |  | 183 | 6 |  | 182 | 2 |
| 15LJ1-2-17 | 139 | 223 | 0.62 | 0.05522 | 0.00193 |  | 0.43936 | 0.01479 |  | 0.05786 | 0.00079 |  | 421 | 51 |  | 370 | 10 |  | 363 | 5 |
| 15LJ1-2-18 | 108 | 159 | 0.68 | 0.05334 | 0.00322 |  | 0.27176 | 0.01460 |  | 0.03793 | 0.00064 |  | 343 | 91 |  | 244 | 12 |  | 240 | 4 |
| 15LJ1-2-19 | 93 | 322 | 0.29 | 0.05164 | 0.00199 |  | 0.28118 | 0.01042 |  | 0.03960 | 0.00052 |  | 269 | 61 |  | 252 | 8 |  | 250 | 3 |
| 15LJ1-2-20 | 396 | 457 | 0.87 | 0.05098 | 0.00137 |  | 0.28120 | 0.00767 |  | 0.03992 | 0.00044 |  | 240 | 42 |  | 252 | 6 |  | 252 | 3 |
| 15LJ1-2-21 | 200 | 406 | 0.49 | 0.05237 | 0.00157 |  | 0.28995 | 0.00872 |  | 0.04011 | 0.00050 |  | 302 | 46 |  | 259 | 7 |  | 253 | 3 |
| 15LJ1-2-22 | 199 | 253 | 0.79 | 0.05366 | 0.00248 |  | 0.28758 | 0.01257 |  | 0.03923 | 0.00059 |  | 357 | 71 |  | 257 | 10 |  | 248 | 4 |
| 15LJ1-2-23 | 92 | 120 | 0.77 | 0.05294 | 0.00305 |  | 0.27975 | 0.01494 |  | 0.03925 | 0.00063 |  | 326 | 92 |  | 250 | 12 |  | 248 | 4 |
| 15LJ1-2-24 | 124 | 172 | 0.72 | 0.05254 | 0.00277 |  | 0.26555 | 0.01370 |  | 0.03673 | 0.00057 |  | 309 | 89 |  | 239 | 11 |  | 233 | 4 |
| 15LJ1-2-25 | 367 | 641 | 0.57 | 0.05204 | 0.00149 |  | 0.26754 | 0.00805 |  | 0.03697 | 0.00041 |  | 287 | 48 |  | 241 | 6 |  | 234 | 3 |
| 15LJ1-2-26 | 53 | 372 | 0.14 | 0.11594 | 0.00167 |  | 5.43726 | 0.08281 |  | 0.33718 | 0.00277 |  | 1895 | 16 |  | 1891 | 13 |  | 1873 | 13 |
| 15LJ1-2-27 | 47 | 96 | 0.49 | 0.05491 | 0.00329 |  | 0.37832 | 0.02164 |  | 0.05134 | 0.00117 |  | 409 | 87 |  | 326 | 16 |  | 323 | 7 |
| 15LJ1-2-28 | 118 | 206 | 0.57 | 0.11253 | 0.00188 |  | 4.72373 | 0.07876 |  | 0.30250 | 0.00254 |  | 1841 | 18 |  | 1771 | 14 |  | 1704 | 13 |
| 15LJ1-2-29 | 184 | 374 | 0.49 | 0.04942 | 0.00238 |  | 0.19867 | 0.00969 |  | 0.02912 | 0.00048 |  | 168 | 83 |  | 184 | 8 |  | 185 | 3 |
| 15LJ1-2-30 | 250 | 449 | 0.56 | 0.05145 | 0.00191 |  | 0.28019 | 0.01045 |  | 0.03931 | 0.00054 |  | 261 | 60 |  | 251 | 8 |  | 249 | 3 |
| 15LJ1-2-31 | 51 | 136 | 0.37 | 0.05121 | 0.00347 |  | 0.26165 | 0.01812 |  | 0.03707 | 0.00073 |  | 250 | 123 |  | 236 | 15 |  | 235 | 5 |
| 15LJ1-2-32 | 118 | 223 | 0.53 | 0.05218 | 0.00361 |  | 0.27857 | 0.01730 |  | 0.03923 | 0.00072 |  | 293 | 108 |  | 250 | 14 |  | 248 | 4 |
| 15LJ1-2-33 | 72 | 210 | 0.34 | 0.05196 | 0.00247 |  | 0.30050 | 0.01348 |  | 0.04216 | 0.00057 |  | 284 | 78 |  | 267 | 11 |  | 266 | 4 |
| 15LJ1-2-34 | 106 | 272 | 0.39 | 0.04994 | 0.00252 |  | 0.32030 | 0.01627 |  | 0.04654 | 0.00090 |  | 192 | 82 |  | 282 | 13 |  | 293 | 6 |
| 15LJ1-2-36 | 82 | 151 | 0.54 | 0.05115 | 0.00472 |  | 0.29909 | 0.02705 |  | 0.04294 | 0.00089 |  | 248 | 166 |  | 266 | 21 |  | 271 | 6 |
| 15LJ1-2-37 | 527 | 720 | 0.73 | 0.05195 | 0.00159 |  | 0.28870 | 0.00842 |  | 0.04035 | 0.00051 |  | 283 | 44 |  | 258 | 7 |  | 255 | 3 |
| 15LJ1-2-38 | 169 | 351 | 0.48 | 0.04998 | 0.00293 |  | 0.21534 | 0.01192 |  | 0.03146 | 0.00049 |  | 194 | 99 |  | 198 | 10 |  | 200 | 3 |
| 15LJ1-2-39 | 155 | 291 | 0.53 | 0.05176 | 0.00206 |  | 0.28686 | 0.01109 |  | 0.04028 | 0.00054 |  | 275 | 64 |  | 256 | 9 |  | 255 | 3 |
| 15LJ1-2-40 | 43 | 188 | 0.23 | 0.05186 | 0.00216 |  | 0.30650 | 0.01385 |  | 0.04304 | 0.00070 |  | 279 | 73 |  | 271 | 11 |  | 272 | 4 |
| 15LJ1-2-41 | 199 | 479 | 0.42 | 0.05203 | 0.00222 |  | 0.21098 | 0.00863 |  | 0.02949 | 0.00035 |  | 287 | 71 |  | 194 | 7 |  | 187 | 2 |
| 15LJ1-2-42 | 29 | 270 | 0.11 | 0.05147 | 0.00201 |  | 0.26188 | 0.00982 |  | 0.03710 | 0.00048 |  | 262 | 62 |  | 236 | 8 |  | 235 | 3 |
| 15LJ1-2-43 | 286 | 581 | 0.49 | 0.05090 | 0.00131 |  | 0.29368 | 0.00787 |  | 0.04167 | 0.00045 |  | 236 | 42 |  | 261 | 6 |  | 263 | 3 |
| 15LJ1-2-44 | 62 | 106 | 0.58 | 0.05346 | 0.00307 |  | 0.29442 | 0.01580 |  | 0.04113 | 0.00078 |  | 348 | 87 |  | 262 | 12 |  | 260 | 5 |
| 15LJ1-2-45 | 185 | 319 | 0.58 | 0.05216 | 0.00210 |  | 0.28980 | 0.01150 |  | 0.04046 | 0.00055 |  | 292 | 66 |  | 258 | 9 |  | 256 | 3 |
| 15LJ1-2-46 | 144 | 231 | 0.62 | 0.05348 | 0.00197 |  | 0.29835 | 0.01052 |  | 0.04079 | 0.00061 |  | 349 | 53 |  | 265 | 8 |  | 258 | 4 |
| 15LJ1-2-47 | 154 | 147 | 1.04 | 0.05235 | 0.00242 |  | 0.28019 | 0.01241 |  | 0.03948 | 0.00056 |  | 301 | 75 |  | 251 | 10 |  | 250 | 3 |
| 15LJ1-2-48 | 145 | 349 | 0.41 | 0.05062 | 0.00190 |  | 0.20859 | 0.00771 |  | 0.03003 | 0.00035 |  | 224 | 64 |  | 192 | 6 |  | 191 | 2 |
| 15LJ1-2-49 | 128 | 200 | 0.64 | 0.05015 | 0.00243 |  | 0.19958 | 0.00938 |  | 0.02923 | 0.00039 |  | 202 | 84 |  | 185 | 8 |  | 186 | 2 |
| 15LJ1-2-50 | 185 | 237 | 0.78 | 0.05198 | 0.00211 |  | 0.28522 | 0.01192 |  | 0.03991 | 0.00062 |  | 285 | 67 |  | 255 | 9 |  | 252 | 4 |
| 15LJ1-2-51 | 90 | 132 | 0.68 | 0.05200 | 0.00245 |  | 0.30517 | 0.01451 |  | 0.04296 | 0.00071 |  | 285 | 78 |  | 270 | 11 |  | 271 | 4 |
| 15LJ1-2-52 | 93 | 107 | 0.87 | 0.05530 | 0.00337 |  | 0.31152 | 0.01562 |  | 0.04192 | 0.00092 |  | 424 | 73 |  | 275 | 12 |  | 265 | 6 |
| 15LJ1-2-53 | 243 | 300 | 0.81 | 0.05046 | 0.00168 |  | 0.27091 | 0.00937 |  | 0.03879 | 0.00054 |  | 216 | 54 |  | 243 | 7 |  | 245 | 3 |
| 15LJ1-2-54 | 237 | 440 | 0.54 | 0.04999 | 0.00178 |  | 0.19257 | 0.00693 |  | 0.02791 | 0.00042 |  | 194 | 56 |  | 179 | 6 |  | 177 | 3 |
| 15LJ1-2-55 | 155 | 236 | 0.66 | 0.05106 | 0.00244 |  | 0.25793 | 0.01174 |  | 0.03674 | 0.00050 |  | 243 | 80 |  | 233 | 9 |  | 233 | 3 |
| 15LJ1-2-56 | 8 | 29 | 0.27 | 0.16143 | 0.00336 |  | 10.33394 | 0.21343 |  | 0.46349 | 0.00576 |  | 2471 | 19 |  | 2465 | 19 |  | 2455 | 25 |
| 15LJ1-2-57 | 266 | 405 | 0.66 | 0.05176 | 0.00153 |  | 0.29766 | 0.00876 |  | 0.04163 | 0.00048 |  | 275 | 46 |  | 265 | 7 |  | 263 | 3 |
| 15LJ1-2-58 | 182 | 136 | 1.34 | 0.05378 | 0.00251 |  | 0.29950 | 0.01428 |  | 0.04061 | 0.00065 |  | 362 | 79 |  | 266 | 11 |  | 257 | 4 |
| 15LJ1-2-59 | 274 | 471 | 0.58 | 0.05313 | 0.00159 |  | 0.28279 | 0.00834 |  | 0.03847 | 0.00042 |  | 334 | 47 |  | 253 | 7 |  | 243 | 3 |
| 15LJ1-2-60 | 150 | 246 | 0.61 | 0.05106 | 0.00198 |  | 0.27513 | 0.00996 |  | 0.03921 | 0.00054 |  | 243 | 58 |  | 247 | 8 |  | 248 | 3 |
| 15LJ1-2-61 | 151 | 311 | 0.49 | 0.05342 | 0.00204 |  | 0.28195 | 0.01117 |  | 0.03795 | 0.00053 |  | 347 | 64 |  | 252 | 9 |  | 240 | 3 |
| 15LJ1-2-62 | 78 | 81 | 0.97 | 0.05211 | 0.00297 |  | 0.29202 | 0.01597 |  | 0.04080 | 0.00080 |  | 290 | 89 |  | 260 | 13 |  | 258 | 5 |
| 15LJ1-2-63 | 48 | 39 | 1.25 | 0.16159 | 0.00320 |  | 10.77703 | 0.26679 |  | 0.48042 | 0.00849 |  | 2472 | 20 |  | 2504 | 23 |  | 2529 | 37 |
| 15LJ1-2-64 | 424 | 309 | 1.37 | 0.09204 | 0.00314 |  | 3.27442 | 0.10718 |  | 0.25803 | 0.00249 |  | 1468 | 66 |  | 1475 | 25 |  | 1480 | 13 |
| 15LJ1-2-65 | 176 | 502 | 0.35 | 0.05092 | 0.00180 |  | 0.28602 | 0.00970 |  | 0.04074 | 0.00041 |  | 237 | 84 |  | 255 | 8 |  | 257 | 3 |
| 15LJ1-2-66 | 380 | 360 | 1.06 | 0.05278 | 0.00311 |  | 0.25402 | 0.01390 |  | 0.03515 | 0.00076 |  | 319 | 85 |  | 230 | 11 |  | 223 | 5 |
| 15LJ1-2-67 | 715 | 561 | 1.28 | 0.05148 | 0.00143 |  | 0.28518 | 0.00811 |  | 0.03991 | 0.00042 |  | 262 | 46 |  | 255 | 6 |  | 252 | 3 |
| 15LJ1-2-68 | 145 | 253 | 0.57 | 0.05173 | 0.00193 |  | 0.28180 | 0.01022 |  | 0.03957 | 0.00047 |  | 273 | 61 |  | 252 | 8 |  | 250 | 3 |
| 15LJ1-2-69 | 126 | 346 | 0.36 | 0.05190 | 0.00136 |  | 0.30179 | 0.00780 |  | 0.04211 | 0.00042 |  | 281 | 41 |  | 268 | 6 |  | 266 | 3 |
| 15LJ1-2-70 | 214 | 756 | 0.28 | 0.05224 | 0.00107 |  | 0.32861 | 0.00695 |  | 0.04536 | 0.00048 |  | 296 | 29 |  | 289 | 5 |  | 286 | 3 |
| 15LJ1-2-71 | 102 | 209 | 0.49 | 0.05116 | 0.00245 |  | 0.26852 | 0.01240 |  | 0.03848 | 0.00060 |  | 248 | 77 |  | 242 | 10 |  | 243 | 4 |
| 15LJ1-2-72 | 195 | 319 | 0.61 | 0.05141 | 0.00218 |  | 0.28660 | 0.01223 |  | 0.04028 | 0.00059 |  | 259 | 71 |  | 256 | 10 |  | 255 | 4 |
| 15LJ1-2-73 | 515 | 592 | 0.87 | 0.05159 | 0.00128 |  | 0.28808 | 0.00727 |  | 0.04028 | 0.00041 |  | 267 | 39 |  | 257 | 6 |  | 255 | 3 |
| 15LJ1-2-74 | 141 | 276 | 0.51 | 0.05162 | 0.00169 |  | 0.29640 | 0.00914 |  | 0.04196 | 0.00055 |  | 269 | 47 |  | 264 | 7 |  | 265 | 3 |
| 15LJ1-2-75 | 215 | 246 | 0.87 | 0.05261 | 0.00234 |  | 0.29122 | 0.01232 |  | 0.04070 | 0.00055 |  | 312 | 71 |  | 260 | 10 |  | 257 | 3 |
| 15LJ1-2-76 | 160 | 288 | 0.56 | 0.05169 | 0.00164 |  | 0.27730 | 0.00869 |  | 0.03895 | 0.00046 |  | 272 | 50 |  | 249 | 7 |  | 246 | 3 |
| 15LJ1-2-77 | 68 | 174 | 0.39 | 0.05188 | 0.00316 |  | 0.27124 | 0.01566 |  | 0.03820 | 0.00070 |  | 280 | 99 |  | 244 | 13 |  | 242 | 4 |
| 15LJ1-2-79 | 76 | 107 | 0.71 | 0.10895 | 0.00220 |  | 4.79569 | 0.10189 |  | 0.31809 | 0.00393 |  | 1782 | 21 |  | 1784 | 18 |  | 1780 | 19 |
| 15LJ1-2-80 | 247 | 445 | 0.56 | 0.04995 | 0.00158 |  | 0.19856 | 0.00576 |  | 0.02906 | 0.00032 |  | 193 | 47 |  | 184 | 5 |  | 185 | 2 |
| 16LJ3-1 tuffaceous siltstone from the Yihe Formation | | | | | | | | | | | | | | | | | | | | |
| 16LJ3-1-01 | 2981 | 4119 | 0.72 | 0.04871 | 0.00132 |  | 0.19273 | 0.00550 |  | 0.02842 | 0.00028 |  | 134 | 48 |  | 179 | 5 |  | 181 | 2 |
| 16LJ3-1-02 | 2254 | 3037 | 0.74 | 0.04864 | 0.00132 |  | 0.19160 | 0.00499 |  | 0.02850 | 0.00027 |  | 130 | 43 |  | 178 | 4 |  | 181 | 2 |
| 16LJ3-1-03 | 197 | 403 | 0.49 | 0.05270 | 0.00282 |  | 0.28727 | 0.01479 |  | 0.04033 | 0.00055 |  | 316 | 93 |  | 256 | 12 |  | 255 | 3 |
| 16LJ3-1-04 | 287 | 646 | 0.44 | 0.05000 | 0.00221 |  | 0.27966 | 0.01222 |  | 0.04071 | 0.00059 |  | 195 | 74 |  | 250 | 10 |  | 257 | 4 |
| 16LJ3-1-05 | 4475 | 4206 | 1.06 | 0.05153 | 0.00134 |  | 0.20051 | 0.00508 |  | 0.02802 | 0.00022 |  | 265 | 44 |  | 186 | 4 |  | 178 | 1 |
| 16LJ3-1-06 | 470 | 547 | 0.86 | 0.05069 | 0.00235 |  | 0.24579 | 0.01146 |  | 0.03511 | 0.00047 |  | 227 | 83 |  | 223 | 9 |  | 222 | 3 |
| 16LJ3-1-07 | 1941 | 2756 | 0.70 | 0.05022 | 0.00142 |  | 0.20290 | 0.00568 |  | 0.02924 | 0.00031 |  | 205 | 45 |  | 188 | 5 |  | 186 | 2 |
| 16LJ3-1-08 | 406 | 529 | 0.77 | 0.11247 | 0.00213 |  | 4.61025 | 0.09409 |  | 0.29507 | 0.00293 |  | 1840 | 23 |  | 1751 | 17 |  | 1667 | 15 |
| 16LJ3-1-09 | 280 | 513 | 0.55 | 0.04994 | 0.00238 |  | 0.27324 | 0.01291 |  | 0.03999 | 0.00059 |  | 192 | 82 |  | 245 | 10 |  | 253 | 4 |
| 16LJ3-1-10 | 727 | 856 | 0.85 | 0.05442 | 0.00208 |  | 0.29840 | 0.01167 |  | 0.03962 | 0.00048 |  | 389 | 66 |  | 265 | 9 |  | 251 | 3 |
| 16LJ3-1-11 | 771 | 1550 | 0.50 | 0.16201 | 0.00278 |  | 9.91004 | 0.17076 |  | 0.44091 | 0.00336 |  | 2477 | 19 |  | 2426 | 16 |  | 2355 | 15 |
| 16LJ3-1-12 | 497 | 1114 | 0.45 | 0.05288 | 0.00192 |  | 0.28907 | 0.01040 |  | 0.03962 | 0.00042 |  | 324 | 63 |  | 258 | 8 |  | 250 | 3 |
| 16LJ3-1-14 | 863 | 2462 | 0.35 | 0.11239 | 0.00176 |  | 4.98797 | 0.08995 |  | 0.31986 | 0.00371 |  | 1838 | 17 |  | 1817 | 15 |  | 1789 | 18 |
| 16LJ3-1-15 | 477 | 871 | 0.55 | 0.05005 | 0.00193 |  | 0.27691 | 0.01087 |  | 0.04012 | 0.00048 |  | 197 | 69 |  | 248 | 9 |  | 254 | 3 |
| 16LJ3-1-16 | 566 | 1788 | 0.32 | 0.04991 | 0.00155 |  | 0.28217 | 0.00908 |  | 0.04073 | 0.00051 |  | 191 | 52 |  | 252 | 7 |  | 257 | 3 |
| 16LJ3-1-17 | 670 | 1068 | 0.63 | 0.05150 | 0.00221 |  | 0.28450 | 0.01146 |  | 0.04029 | 0.00054 |  | 263 | 68 |  | 254 | 9 |  | 255 | 3 |
| 16LJ3-1-18 | 731 | 838 | 0.87 | 0.06192 | 0.00259 |  | 0.24512 | 0.01011 |  | 0.02889 | 0.00033 |  | 671 | 69 |  | 223 | 8 |  | 184 | 2 |
| 16LJ3-1-19 | 814 | 1449 | 0.56 | 0.05175 | 0.00180 |  | 0.28384 | 0.01005 |  | 0.03985 | 0.00049 |  | 274 | 59 |  | 254 | 8 |  | 252 | 3 |
| 16LJ3-1-20 | 2067 | 2799 | 0.74 | 0.06281 | 0.00179 |  | 0.32717 | 0.00981 |  | 0.03743 | 0.00037 |  | 702 | 47 |  | 287 | 8 |  | 237 | 2 |
| 16LJ3-1-21 | 3146 | 3642 | 0.86 | 0.06001 | 0.00157 |  | 0.23568 | 0.00559 |  | 0.02869 | 0.00028 |  | 604 | 34 |  | 215 | 5 |  | 182 | 2 |
| 16LJ3-1-22 | 607 | 971 | 0.63 | 0.05526 | 0.00212 |  | 0.30090 | 0.01171 |  | 0.03964 | 0.00054 |  | 423 | 62 |  | 267 | 9 |  | 251 | 3 |
| 16LJ3-1-23 | 2015 | 3249 | 0.62 | 0.05114 | 0.00118 |  | 0.20778 | 0.00506 |  | 0.02933 | 0.00031 |  | 247 | 37 |  | 192 | 4 |  | 186 | 2 |
| 16LJ3-1-24 | 368 | 605 | 0.61 | 0.04973 | 0.00222 |  | 0.27175 | 0.01184 |  | 0.04017 | 0.00050 |  | 182 | 79 |  | 244 | 9 |  | 254 | 3 |
| 16LJ3-1-25 | 1578 | 2835 | 0.56 | 0.05008 | 0.00150 |  | 0.20048 | 0.00605 |  | 0.02897 | 0.00032 |  | 199 | 50 |  | 186 | 5 |  | 184 | 2 |
| 16LJ3-1-26 | 1996 | 3136 | 0.64 | 0.05441 | 0.00267 |  | 0.21801 | 0.01158 |  | 0.02869 | 0.00029 |  | 388 | 102 |  | 200 | 10 |  | 182 | 2 |
| 16LJ3-1-27 | 412 | 1537 | 0.27 | 0.10974 | 0.00176 |  | 4.59902 | 0.07714 |  | 0.30194 | 0.00231 |  | 1795 | 19 |  | 1749 | 14 |  | 1701 | 11 |
| 16LJ3-1-28 | 372 | 393 | 0.95 | 0.05228 | 0.00303 |  | 0.28080 | 0.01577 |  | 0.03980 | 0.00056 |  | 298 | 103 |  | 251 | 13 |  | 252 | 3 |
| 16LJ3-1-29 | 4791 | 5361 | 0.89 | 0.05070 | 0.00124 |  | 0.20007 | 0.00508 |  | 0.02836 | 0.00021 |  | 227 | 45 |  | 185 | 4 |  | 180 | 1 |
| 16LJ3-1-30 | 2744 | 3538 | 0.78 | 0.04919 | 0.00157 |  | 0.19378 | 0.00607 |  | 0.02838 | 0.00025 |  | 157 | 57 |  | 180 | 5 |  | 180 | 2 |
| 16LJ3-1-31 | 426 | 750 | 0.57 | 0.05268 | 0.00235 |  | 0.29014 | 0.01266 |  | 0.04013 | 0.00051 |  | 315 | 76 |  | 259 | 10 |  | 254 | 3 |
| 16LJ3-1-32 | 234 | 471 | 0.50 | 0.05869 | 0.00364 |  | 0.35299 | 0.02172 |  | 0.04367 | 0.00081 |  | 556 | 102 |  | 307 | 16 |  | 276 | 5 |
| 16LJ3-1-33 | 252 | 630 | 0.40 | 0.05262 | 0.00229 |  | 0.29076 | 0.01221 |  | 0.04021 | 0.00047 |  | 312 | 74 |  | 259 | 10 |  | 254 | 3 |
| 16LJ3-1-34 | 1764 | 2844 | 0.62 | 0.05099 | 0.00138 |  | 0.20032 | 0.00527 |  | 0.02837 | 0.00029 |  | 240 | 42 |  | 185 | 4 |  | 180 | 2 |
| 16LJ3-1-35 | 1214 | 1234 | 0.98 | 0.05162 | 0.00189 |  | 0.28286 | 0.01053 |  | 0.03940 | 0.00037 |  | 269 | 68 |  | 253 | 8 |  | 249 | 2 |
| 16LJ3-1-36 | 530 | 1071 | 0.50 | 0.04949 | 0.00148 |  | 0.19813 | 0.00600 |  | 0.02889 | 0.00028 |  | 171 | 52 |  | 184 | 5 |  | 184 | 2 |
| 16LJ3-1-37 | 179 | 676 | 0.26 | 0.11352 | 0.00201 |  | 4.31396 | 0.07970 |  | 0.27457 | 0.00269 |  | 1856 | 20 |  | 1696 | 15 |  | 1564 | 14 |
| 16LJ3-1-38 | 507 | 748 | 0.68 | 0.05157 | 0.00138 |  | 0.28583 | 0.00759 |  | 0.04011 | 0.00034 |  | 266 | 45 |  | 255 | 6 |  | 253 | 2 |
| 16LJ3-1-39 | 118 | 246 | 0.48 | 0.05272 | 0.00277 |  | 0.28639 | 0.01485 |  | 0.03980 | 0.00058 |  | 317 | 91 |  | 256 | 12 |  | 252 | 4 |
| 16LJ3-1-40 | 567 | 665 | 0.85 | 0.05404 | 0.00193 |  | 0.29561 | 0.01085 |  | 0.03950 | 0.00040 |  | 373 | 64 |  | 263 | 9 |  | 250 | 2 |
| 16LJ3-1-42 | 196 | 278 | 0.70 | 0.05045 | 0.00242 |  | 0.27659 | 0.01278 |  | 0.04011 | 0.00052 |  | 216 | 83 |  | 248 | 10 |  | 254 | 3 |
| 16LJ3-1-43 | 925 | 1318 | 0.70 | 0.05369 | 0.00134 |  | 0.21877 | 0.00576 |  | 0.02950 | 0.00031 |  | 358 | 40 |  | 201 | 5 |  | 187 | 2 |
| 16LJ3-1-44 | 865 | 1116 | 0.78 | 0.05072 | 0.00145 |  | 0.20009 | 0.00600 |  | 0.02864 | 0.00030 |  | 228 | 50 |  | 185 | 5 |  | 182 | 2 |
| 16LJ3-1-45 | 346 | 389 | 0.89 | 0.05117 | 0.00202 |  | 0.28208 | 0.01206 |  | 0.03988 | 0.00051 |  | 248 | 75 |  | 252 | 10 |  | 252 | 3 |
| 16LJ3-1-46 | 354 | 672 | 0.53 | 0.05177 | 0.00143 |  | 0.28707 | 0.00818 |  | 0.04020 | 0.00038 |  | 275 | 48 |  | 256 | 6 |  | 254 | 2 |
| 16LJ3-1-47 | 95 | 248 | 0.39 | 0.04909 | 0.00207 |  | 0.27338 | 0.01175 |  | 0.04055 | 0.00050 |  | 152 | 77 |  | 245 | 9 |  | 256 | 3 |
| 16LJ3-1-48 | 502 | 594 | 0.85 | 0.05170 | 0.00162 |  | 0.28328 | 0.00864 |  | 0.03977 | 0.00038 |  | 272 | 52 |  | 253 | 7 |  | 251 | 2 |
| 16LJ3-1-49 | 515 | 696 | 0.74 | 0.05181 | 0.00175 |  | 0.20404 | 0.00713 |  | 0.02852 | 0.00031 |  | 277 | 60 |  | 189 | 6 |  | 181 | 2 |
| 16LJ3-1-50 | 159 | 138 | 1.16 | 0.05745 | 0.00433 |  | 0.22714 | 0.01584 |  | 0.02968 | 0.00051 |  | 509 | 124 |  | 208 | 13 |  | 189 | 3 |
| 16LJ3-1-51 | 103 | 124 | 0.83 | 0.05620 | 0.00284 |  | 0.41428 | 0.01984 |  | 0.05421 | 0.00073 |  | 460 | 82 |  | 352 | 14 |  | 340 | 4 |
| 16LJ3-1-52 | 236 | 306 | 0.77 | 0.04747 | 0.00176 |  | 0.26261 | 0.00950 |  | 0.04015 | 0.00045 |  | 73 | 61 |  | 237 | 8 |  | 254 | 3 |
| 16LJ3-1-53 | 1481 | 1541 | 0.96 | 0.05652 | 0.00122 |  | 0.26185 | 0.00553 |  | 0.03337 | 0.00025 |  | 473 | 33 |  | 236 | 4 |  | 212 | 2 |
| 16LJ3-1-54 | 546 | 845 | 0.65 | 0.05309 | 0.00173 |  | 0.29290 | 0.00940 |  | 0.03970 | 0.00035 |  | 333 | 57 |  | 261 | 7 |  | 251 | 2 |
| 16LJ3-1-55 | 209 | 425 | 0.49 | 0.05002 | 0.00176 |  | 0.27614 | 0.00934 |  | 0.03993 | 0.00042 |  | 196 | 59 |  | 248 | 7 |  | 252 | 3 |
| 16LJ3-1-56 | 281 | 840 | 0.33 | 0.05149 | 0.00130 |  | 0.28423 | 0.00672 |  | 0.03997 | 0.00045 |  | 263 | 34 |  | 254 | 5 |  | 253 | 3 |
| 16LJ3-1-57 | 89 | 213 | 0.42 | 0.05172 | 0.00233 |  | 0.28785 | 0.01268 |  | 0.04057 | 0.00051 |  | 273 | 78 |  | 257 | 10 |  | 256 | 3 |
| 16LJ3-1-58 | 1398 | 1383 | 1.01 | 0.05697 | 0.00154 |  | 0.22898 | 0.00562 |  | 0.02919 | 0.00032 |  | 491 | 35 |  | 209 | 5 |  | 185 | 2 |
| 16LJ3-1-59 | 343 | 543 | 0.63 | 0.05116 | 0.00169 |  | 0.28093 | 0.00906 |  | 0.03980 | 0.00047 |  | 248 | 52 |  | 251 | 7 |  | 252 | 3 |
| 16LJ3-1-60 | 162 | 348 | 0.47 | 0.05505 | 0.00226 |  | 0.31090 | 0.01254 |  | 0.04098 | 0.00050 |  | 414 | 68 |  | 275 | 10 |  | 259 | 3 |
| 16LJ3-1-62 | 691 | 972 | 0.71 | 0.05083 | 0.00132 |  | 0.20681 | 0.00533 |  | 0.02928 | 0.00023 |  | 233 | 45 |  | 191 | 4 |  | 186 | 1 |
| 16LJ3-1-64 | 176 | 189 | 0.93 | 0.16015 | 0.00271 |  | 10.42934 | 0.19396 |  | 0.46912 | 0.00568 |  | 2457 | 16 |  | 2474 | 17 |  | 2480 | 25 |
| 16LJ3-1-65 | 105 | 210 | 0.50 | 0.04846 | 0.00243 |  | 0.26220 | 0.01275 |  | 0.03968 | 0.00053 |  | 122 | 86 |  | 236 | 10 |  | 251 | 3 |
| 16LJ3-1-66 | 227 | 492 | 0.46 | 0.04894 | 0.00152 |  | 0.27415 | 0.00850 |  | 0.04040 | 0.00044 |  | 145 | 52 |  | 246 | 7 |  | 255 | 3 |
| 16LJ3-1-67 | 248 | 505 | 0.49 | 0.05585 | 0.00183 |  | 0.30393 | 0.00962 |  | 0.03936 | 0.00042 |  | 446 | 51 |  | 269 | 7 |  | 249 | 3 |
| 16LJ3-1-68 | 167 | 293 | 0.57 | 0.05131 | 0.00247 |  | 0.20392 | 0.01001 |  | 0.02851 | 0.00032 |  | 255 | 92 |  | 188 | 8 |  | 181 | 2 |
| 16LJ3-1-69 | 611 | 1388 | 0.44 | 0.05039 | 0.00105 |  | 0.29219 | 0.00657 |  | 0.04162 | 0.00041 |  | 213 | 34 |  | 260 | 5 |  | 263 | 3 |
| 15JFS10-1 pyroxene andesite from the Guosong Formation | | | | | | | | | | | | | | | | | | | | |
| 15JFS10-1-01 | 400 | 429 | 0.93 | 0.05570 | 0.82956 |  | 0.53968 | 1.71699 |  | 0.07027 | 1.50329 |  | 440 | 18 |  | 438 | 6 |  | 438 | 6 |
| 15JFS10-1-02 | 860 | 1019 | 0.84 | 0.04867 | 0.89551 |  | 0.12032 | 1.88051 |  | 0.01793 | 1.65360 |  | 132 | 21 |  | 115 | 2 |  | 115 | 2 |
| 15JFS10-1-03 | 387 | 678 | 0.57 | 0.05060 | 0.90236 |  | 0.17031 | 1.90152 |  | 0.02441 | 1.67378 |  | 222 | 21 |  | 160 | 3 |  | 156 | 3 |
| 15JFS10-1-04 | 113 | 112 | 1.01 | 0.04964 | 2.19518 |  | 0.24247 | 2.73156 |  | 0.03542 | 1.62560 |  | 178 | 50 |  | 220 | 5 |  | 224 | 4 |
| 15JFS10-1-05 | 161 | 351 | 0.46 | 0.07181 | 0.82014 |  | 1.56574 | 1.75435 |  | 0.15813 | 1.55084 |  | 981 | 17 |  | 957 | 11 |  | 946 | 14 |
| 15JFS10-1-06 | 524 | 2779 | 0.19 | 0.04734 | 0.72235 |  | 0.11418 | 1.71205 |  | 0.01749 | 1.55220 |  | 66 | 17 |  | 110 | 2 |  | 112 | 2 |
| 15JFS10-1-07 | 64 | 81 | 0.79 | 0.05013 | 1.86001 |  | 0.24890 | 2.38948 |  | 0.03601 | 1.50000 |  | 201 | 43 |  | 226 | 5 |  | 228 | 3 |
| 15JFS10-1-08 | 104 | 142 | 0.73 | 0.10126 | 0.38854 |  | 3.96898 | 1.71986 |  | 0.28426 | 1.67539 |  | 1647 | 7 |  | 1628 | 14 |  | 1613 | 24 |
| 15JFS10-1-09 | 66 | 79 | 0.84 | 0.05258 | 1.81845 |  | 0.25351 | 2.42891 |  | 0.03497 | 1.61023 |  | 311 | 41 |  | 229 | 5 |  | 222 | 4 |
| 15JFS10-1-10 | 444 | 573 | 0.77 | 0.05589 | 1.45527 |  | 0.52467 | 2.09882 |  | 0.06808 | 1.51236 |  | 448 | 32 |  | 428 | 7 |  | 425 | 6 |
| 15JFS10-1-11 | 90 | 85 | 1.05 | 0.05216 | 1.70307 |  | 0.25882 | 2.29793 |  | 0.03599 | 1.54274 |  | 292 | 38 |  | 234 | 5 |  | 228 | 3 |
| 15JFS10-1-12 | 96 | 94 | 1.03 | 0.05200 | 1.78475 |  | 0.26124 | 2.34397 |  | 0.03643 | 1.51949 |  | 286 | 40 |  | 236 | 5 |  | 231 | 3 |
| 15JFS10-1-13 | 81 | 81 | 1.00 | 0.04996 | 1.85049 |  | 0.24819 | 2.48922 |  | 0.03603 | 1.66491 |  | 193 | 42 |  | 225 | 5 |  | 228 | 4 |
| 15JFS10-1-14 | 1050 | 511 | 2.05 | 0.05163 | 0.71454 |  | 0.25373 | 1.67659 |  | 0.03564 | 1.51670 |  | 269 | 16 |  | 230 | 3 |  | 226 | 3 |
