# Supplementary material for: New insights on the early Mesozoic evolution of multiple tectonic regimes in the northeastern North China Craton from the detrital zircon provenance of sedimentary strata
Source: Copernicus journal article supplement (doi:10.5194/se-9-1375-2018), 2018-11-29
Supplement: Supplementary file 3 [file Table S2.doc]

**Table S2** **Zircon Hf isotopic data of early Mesozoic strata in the northeastern North China Craton**

| sample No. | t(Ma) | 176Yb/177Hf | 176Lu/177Hf | 176Hf/177Hf | 2σm | εHf(*t*) | 2σ | TDM1(Ma) | TDM2(Ma) | fLu/Hf |
| --- | --- | --- | --- | --- | --- | --- | --- | --- | --- | --- |
| 15LJ4-11 fine-grained feldspathic quartz sandstone from the Heisonggou Formation | | | | | | | | | | |
| 15LJ4-11-01 | 269 | 0.030878 | 0.001555 | 0.282400 | 0.000037 | -7.5 | 1.30 | 1222 | 1770 | -0.95 |
| 15LJ4-11-02 | 2499 | 0.012390 | 0.000492 | 0.281141 | 0.000037 | -2.5 | 1.33 | 2900 | 3149 | -0.99 |
| 15LJ4-11-03 | 1822 | 0.004357 | 0.000176 | 0.281636 | 0.000032 | 0.2 | 1.14 | 2216 | 2465 | -0.99 |
| 15LJ4-11-04 | 324 | 0.025750 | 0.001142 | 0.282260 | 0.000039 | -11.2 | 1.39 | 1404 | 2044 | -0.97 |
| 15LJ4-11-05 | 383 | 0.094829 | 0.004465 | 0.282145 | 0.000054 | -14.9 | 1.92 | 1716 | 2317 | -0.87 |
| 15LJ4-11-06 | 2530 | 0.020443 | 0.000832 | 0.281344 | 0.000031 | 4.9 | 1.09 | 2650 | 2723 | -0.97 |
| 15LJ4-11-07 | 358 | 0.034011 | 0.001376 | 0.282209 | 0.000046 | -12.4 | 1.62 | 1486 | 2142 | -0.96 |
| 15LJ4-11-08 | 269 | 0.017188 | 0.000759 | 0.282363 | 0.000031 | -8.7 | 1.10 | 1247 | 1842 | -0.98 |
| 15LJ4-11-09 | 305 | 0.034333 | 0.001479 | 0.282260 | 0.000043 | -11.7 | 1.52 | 1418 | 2061 | -0.96 |
| 15LJ4-11-10 | 304 | 0.032782 | 0.001576 | 0.282368 | 0.000039 | -7.9 | 1.39 | 1268 | 1822 | -0.95 |
| 15LJ4-11-11 | 268 | 0.024580 | 0.001146 | 0.282346 | 0.000037 | -9.4 | 1.30 | 1284 | 1886 | -0.97 |
| 15LJ4-11-12 | 304 | 0.030930 | 0.001352 | 0.282131 | 0.000038 | -16.3 | 1.36 | 1594 | 2347 | -0.96 |
| 15LJ4-11-13 | 250 | 0.032840 | 0.001404 | 0.282425 | 0.000038 | -7.0 | 1.34 | 1181 | 1722 | -0.96 |
| 15LJ4-11-14 | 381 | 0.009567 | 0.000395 | 0.282120 | 0.000032 | -14.8 | 1.12 | 1569 | 2311 | -0.99 |
| 15LJ4-11-15 | 382 | 0.022181 | 0.000900 | 0.282334 | 0.000035 | -7.3 | 1.25 | 1292 | 1841 | -0.97 |
| 15LJ4-11-16 | 322 | 0.018895 | 0.000940 | 0.282306 | 0.000044 | -9.6 | 1.57 | 1334 | 1942 | -0.97 |
| 15LJ4-11-17 | 272 | 0.015897 | 0.000739 | 0.282163 | 0.000035 | -15.7 | 1.24 | 1524 | 2287 | -0.98 |
| 15LJ4-11-18 | 2513 | 0.021388 | 0.000839 | 0.281152 | 0.000041 | -2.3 | 1.45 | 2912 | 3153 | -0.97 |
| 15LJ4-11-19 | 1812 | 0.014055 | 0.000539 | 0.281621 | 0.000045 | -1.0 | 1.59 | 2256 | 2530 | -0.98 |
| 15LJ4-11-20 | 1862 | 0.017590 | 0.000717 | 0.281570 | 0.000036 | -1.9 | 1.28 | 2337 | 2627 | -0.98 |
| 15LJ4-11-21 | 1851 | 0.018241 | 0.000709 | 0.281604 | 0.000051 | -0.9 | 1.80 | 2289 | 2556 | -0.98 |
| 15LJ4-11-22 | 2466 | 0.011050 | 0.000441 | 0.281110 | 0.000030 | -4.2 | 1.08 | 2937 | 3230 | -0.99 |
| 15JFS1-1 medium-grained feldspathic quartz sandstone from the Xiaoyingzi Formation | | | | | | | | | | |
| 15JFS1-1-01 | 224 | 0.010572 | 0.000482 | 0.282316 | 0.000028 | -11.3 | 0.98 | 1304 | 1974 | -0.99 |
| 15JFS1-1-02 | 392 | 0.016055 | 0.000761 | 0.281915 | 0.000029 | -21.9 | 1.01 | 1866 | 2764 | -0.98 |
| 15JFS1-1-03 | 397 | 0.007092 | 0.000426 | 0.281994 | 0.000039 | -18.9 | 1.37 | 1742 | 2581 | -0.99 |
| 15JFS1-1-04 | 294 | 0.075349 | 0.003219 | 0.282467 | 0.000038 | -5.0 | 1.36 | 1180 | 1626 | -0.90 |
| 15JFS1-1-05 | 253 | 0.028958 | 0.001235 | 0.282305 | 0.000032 | -11.2 | 1.13 | 1344 | 1986 | -0.96 |
| 15JFS1-1-06 | 231 | 0.018984 | 0.000873 | 0.282143 | 0.000031 | -17.3 | 1.09 | 1557 | 2358 | -0.97 |
| 15JFS1-1-07 | 1916 | 0.009901 | 0.000393 | 0.281573 | 0.000027 | -0.2 | 0.96 | 2313 | 2560 | -0.99 |
| 15JFS1-1-08 | 264 | 0.013156 | 0.000551 | 0.282470 | 0.000025 | -5.0 | 0.88 | 1093 | 1605 | -0.98 |
| 15JFS1-1-09 | 315 | 0.019194 | 0.000968 | 0.282229 | 0.000034 | -12.5 | 1.19 | 1442 | 2118 | -0.97 |
| 15JFS1-1-10 | 220 | 0.017581 | 0.000754 | 0.282217 | 0.000028 | -14.9 | 1.00 | 1449 | 2198 | -0.98 |
| 15JFS1-1-11 | 569 | 0.022322 | 0.000740 | 0.282666 | 0.000035 | 8.5 | 1.23 | 824 | 980 | -0.98 |
| 15JFS1-1-12 | 1865 | 0.024991 | 0.000969 | 0.281510 | 0.000027 | -4.3 | 0.97 | 2434 | 2775 | -0.97 |
| 15JFS1-1-13 | 254 | 0.012811 | 0.000670 | 0.282287 | 0.000033 | -11.7 | 1.16 | 1350 | 2021 | -0.98 |
| 15JFS1-1-14 | 224 | 0.007848 | 0.000372 | 0.282353 | 0.000029 | -10.0 | 1.04 | 1249 | 1889 | -0.99 |
| 15JFS1-1-15 | 496 | 0.010165 | 0.000351 | 0.282641 | 0.000027 | 6.2 | 0.97 | 851 | 1073 | -0.99 |
| 15JFS1-1-16 | 691 | 0.041945 | 0.001493 | 0.282188 | 0.000028 | -6.1 | 0.98 | 1520 | 1998 | -0.96 |
| 15JFS1-1-17 | 221 | 0.024440 | 0.001026 | 0.282261 | 0.000030 | -13.4 | 1.06 | 1399 | 2102 | -0.97 |
| 15JFS1-1-18 | 223 | 0.011469 | 0.000514 | 0.282302 | 0.000029 | -11.8 | 1.02 | 1324 | 2005 | -0.98 |
| 15JFS1-1-19 | 369 | 0.050996 | 0.001991 | 0.282320 | 0.000033 | -8.4 | 1.16 | 1351 | 1897 | -0.94 |
| 15JFS1-1-20 | 277 | 0.020275 | 0.000965 | 0.282271 | 0.000029 | -11.8 | 1.03 | 1383 | 2047 | -0.97 |
| 15JFS1-1-21 | 453 | 0.038230 | 0.001506 | 0.282585 | 0.000043 | 2.9 | 1.51 | 956 | 1247 | -0.95 |
| 15JFS1-1-22 | 234 | 0.011495 | 0.000539 | 0.282355 | 0.000035 | -9.7 | 1.24 | 1252 | 1881 | -0.98 |
| 15JFS1-1-23 | 364 | 0.039374 | 0.001646 | 0.282373 | 0.000043 | -6.5 | 1.53 | 1263 | 1776 | -0.95 |
| 15JFS1-1-24 | 1928 | 0.009990 | 0.000404 | 0.281544 | 0.000030 | -0.9 | 1.08 | 2353 | 2618 | -0.99 |
| 15JFS1-1-25 | 708 | 0.015670 | 0.000652 | 0.282032 | 0.000029 | -10.9 | 1.03 | 1701 | 2310 | -0.98 |
| 15LJ1-2 fine-grained feldspathic quartz sandstone from the Yihe Formation | | | | | | | | | | |
| 15LJ1-2-01 | 249 | 0.012238 | 0.000528 | 0.282749 | 0.000073 | 4.6 | 2.58 | 704 | 986 | -0.98 |
| 15LJ1-2-02 | 182 | 0.025958 | 0.001161 | 0.282872 | 0.000067 | 7.4 | 2.36 | 541 | 753 | -0.97 |
| 15LJ1-2-03 | 248 | 0.020145 | 0.000857 | 0.282459 | 0.000065 | -5.8 | 2.30 | 1116 | 1641 | -0.97 |
| 15LJ1-2-04 | 234 | 0.013270 | 0.000677 | 0.282783 | 0.000069 | 5.4 | 2.45 | 658 | 918 | -0.98 |
| 15LJ1-2-05 | 185 | 0.032956 | 0.001273 | 0.282997 | 0.000075 | 11.9 | 2.67 | 364 | 470 | -0.96 |
| 15LJ1-2-06 | 255 | 0.016178 | 0.000836 | 0.282806 | 0.000083 | 6.7 | 2.92 | 630 | 857 | -0.97 |
| 15LJ1-2-07 | 252 | 0.041749 | 0.001679 | 0.282979 | 0.000077 | 12.6 | 2.71 | 394 | 475 | -0.95 |
| 15LJ1-2-08 | 200 | 0.033179 | 0.001239 | 0.282909 | 0.000052 | 9.1 | 1.85 | 489 | 659 | -0.96 |
| 15LJ1-2-09 | 255 | 0.024761 | 0.000989 | 0.282787 | 0.000067 | 6.0 | 2.38 | 659 | 900 | -0.97 |
| 15LJ1-2-10 | 187 | 0.019932 | 0.000768 | 0.283008 | 0.000060 | 12.4 | 2.13 | 343 | 439 | -0.98 |
| 15LJ1-2-11 | 191 | 0.024274 | 0.001003 | 0.282920 | 0.000065 | 9.3 | 2.31 | 471 | 638 | -0.97 |
| 15LJ1-2-12 | 186 | 0.028420 | 0.001214 | 0.282990 | 0.000070 | 11.6 | 2.49 | 374 | 485 | -0.96 |
| 15LJ1-2-13 | 177 | 0.022230 | 0.000950 | 0.282989 | 0.000058 | 11.5 | 2.06 | 372 | 489 | -0.97 |
| 15LJ1-2-14 | 240 | 0.034461 | 0.001388 | 0.282726 | 0.000056 | 3.4 | 2.00 | 753 | 1052 | -0.96 |
| 15LJ1-2-15 | 248 | 0.011688 | 0.000516 | 0.282568 | 0.000037 | -1.9 | 1.33 | 956 | 1394 | -0.98 |
| 15LJ1-2-16 | 185 | 0.029657 | 0.001289 | 0.282915 | 0.000060 | 9.0 | 2.12 | 482 | 655 | -0.96 |
| 15LJ1-2-17 | 246 | 0.030662 | 0.001317 | 0.282693 | 0.000043 | 2.4 | 1.52 | 799 | 1123 | -0.96 |
