# Supplementary material for: New insights on the early Mesozoic evolution of multiple tectonic regimes in the northeastern North China Craton from the detrital zircon provenance of sedimentary strata
Source: Copernicus journal article supplement (doi:10.5194/se-9-1375-2018), 2018-11-29
Supplement: Supplementary file [file se-9-1375-2018-supplement-title-page.pdf › se-9-1375-2018-supplement-title-page.pdf]

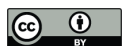

## *Supplement of*

# **New insights on the early Mesozoic evolution of multiple tectonic regimes in the northeastern North China Craton from the detrital zircon provenance of sedimentary strata**

Yi Ni Wang et al.

*Correspondence to:* Wen Liang Xu ([xuwl@jlu.edu.cn](mailto:xuwl@jlu.edu.cn))

- [se-9-1375-2018-supplement-title-page.pdf](#)
- Supporting information-renew
  - [Supporting information.docx](#)
  - [Tabel S1.doc](#)
  - [Table S2.doc](#)

The copyright of individual parts of the supplement might differ from the CC BY 4.0 License.
